# Supplementary material for: Transcriptomic Analysis of Rice (Oryza sativa) Developing Embryos Using the RNA-Seq Technique
Source: PLoS One. 2012 Feb 8;7(2):e30646. doi: 10.1371/journal.pone.0030646 (PMC3275597; doi:10.1371/journal.pone.0030646)
Supplement: Table S4 — A list of GO categories for each cluster. Functional annotation for each cluster utilized the corresponding GO Slim classification. (XLS) [file pone.0030646.s004.xls]

## Sheet: Sheet1
Table S4 A list of GO categories for each cluster. Functional annotation for each cluster utilized the corresponding GO Slim classification.
GeneID	Description	GO Component	GO Function	GO Process	Cluster
LOC_Os01g01870|13101.t00085	helix-loop-helix DNA-binding domain containing protein, expressed	-	GO:0003700//sequence-specific DNA binding transcription factor activity	-	C1
LOC_Os01g03690|13101.t00259	TKL_IRAK_DUF26-lg.1 - DUF26 kinases have homology to DUF26 containing loci, expressed	-	GO:0000166//nucleotide binding	-	C1
LOC_Os01g04050|13101.t00293	BBTI12 - Bowman-Birk type bran trypsin inhibitor precursor, expressed	-	-	-	C1
LOC_Os01g04280|13101.t00314	calmodulin binding protein, putative, expressed	-	GO:0005515//protein binding	-	C1
LOC_Os01g04409|13101.t00327	OsWAK1 - OsWAK receptor-like cytoplasmic kinase OsWAK-RLCK, expressed	-	GO:0000166//nucleotide binding	-	C1
LOC_Os01g04670|13101.t00352	expressed protein	-	-	-	C1
LOC_Os01g04920|13101.t00375	glycosyl transferase, group 1 domain containing protein, expressed	-	-	GO:0006629//lipid metabolic process	C1
LOC_Os01g05630|13101.t00445	Core histone H2A/H2B/H3/H4 domain containing protein, putative, expressed	-	GO:0003677//DNA binding	-	C1
LOC_Os01g05970|13101.t00477	OsFBO1 - F-box and other domain containing protein, expressed	-	GO:0003677//DNA binding	-	C1
LOC_Os01g06560|13101.t00536	transcription factor HBP-1b, putative, expressed	-	GO:0003677//DNA binding	-	C1
LOC_Os01g06590|13101.t00539	zinc finger, C3HC4 type domain containing protein, expressed	-	GO:0005488//binding	-	C1
LOC_Os01g07970|13101.t00675	expressed protein	-	-	-	C1
LOC_Os01g08150|13101.t00692	expressed protein	-	-	-	C1
LOC_Os01g08380|13101.t00715	transferase family protein, putative, expressed	-	GO:0016740//transferase activity	-	C1
LOC_Os01g09030|13101.t00779	2-aminoethanethiol dioxygenase, putative, expressed	-	-	-	C1
LOC_Os01g09220|13101.t00798	transposon protein, putative, CACTA, En/Spm sub-class, expressed	-	-	-	C1
LOC_Os01g09790|13101.t00855	IQ calmodulin-binding motif domain containing protein, expressed	-	-	-	C1
LOC_Os01g09800|13101.t00856	BTBA1 - Bric-a-Brac,Tramtrack, Broad Complex BTB domain with Ankyrin repeat region, expressed	-	GO:0005515//protein binding	-	C1
LOC_Os01g10860|13101.t00956	expressed protein	-	-	-	C1
LOC_Os01g11340|13101.t01000	cytochrome P450, putative, expressed	-	GO:0003824//catalytic activity	-	C1
LOC_Os01g12110|13101.t01072	expressed protein	-	-	-	C1
LOC_Os01g14850|13101.t01332	MFS18 protein precursor, putative, expressed	-	-	-	C1
LOC_Os01g15000|13101.t01348	lipase, putative, expressed	-	-	GO:0006629//lipid metabolic process	C1
LOC_Os01g15290|13101.t01375	ribosomal L18p/L5e family protein, putative, expressed	-	GO:0005198//structural molecule activity	-	C1
LOC_Os01g16170|13101.t01463	PQ loop repeat domain containing protein, expressed	GO:0016020//membrane	-	-	C1
LOC_Os01g16250|13101.t01471	expressed protein	-	-	-	C1
LOC_Os01g17050|13101.t01550	VQ domain containing protein, putative, expressed	-	-	-	C1
LOC_Os01g17170|13101.t01561	magnesium-protoporphyrin IX monomethyl ester cyclase,chloroplast precursor, putative, expressed	GO:0009536//plastid	-	-	C1
LOC_Os01g22954|13101.t02006	serine carboxypeptidase, putative, expressed	-	-	GO:0009987//cellular process	C1
LOC_Os01g29150|13101.t02534	cytochrome P450 72A1, putative, expressed	GO:0005783//endoplasmic reticulum	-	-	C1
LOC_Os01g34870|13101.t02967	expressed protein	-	-	-	C1
LOC_Os01g40190|13101.t03466	retrotransposon protein, putative, unclassified, expressed	-	-	-	C1
LOC_Os01g40650|13101.t03508	expressed protein	-	-	-	C1
LOC_Os01g43480|13101.t03784	AAA-type ATPase family protein, putative, expressed	-	GO:0000166//nucleotide binding	-	C1
LOC_Os01g46290|13101.t03997	lipase, putative, expressed	GO:0005737//cytoplasm	-	-	C1
LOC_Os01g47760|13101.t04144	OsGrx_I1 - glutaredoxin subgroup III, expressed	-	GO:0003824//catalytic activity	-	C1
LOC_Os01g49200|13101.t04281	microtubule associated protein, putative, expressed	GO:0005634//nucleus	-	-	C1
LOC_Os01g49320|13101.t04293	glycosyl hydrolase, putative, expressed	-	GO:0016787//hydrolase activity	-	C1
LOC_Os01g50420|13101.t04395	STE_MEKK_ste11_MAP3K.7 - STE kinases include homologs to sterile 7, sterile 11 and sterile 20 from yeast, expressed	-	GO:0003677//DNA binding	-	C1
LOC_Os01g51230|13101.t04476	IQ calmodulin-binding motif domain containing protein, expressed	-	-	-	C1
LOC_Os01g52230|13101.t04572	phosphoethanolamine/phosphocholine phosphatase, putative, expressed	-	GO:0003824//catalytic activity	-	C1
LOC_Os01g52500|13101.t04597	NADP-dependent malic enzyme, putative, expressed	-	GO:0003824//catalytic activity	-	C1
LOC_Os01g52660|13101.t04612	POEI51 - Pollen Ole e I allergen and extensin family protein precursor, expressed	-	-	-	C1
LOC_Os01g53710|13101.t04711	dual specificity protein phosphatase, putative, expressed	-	GO:0016787//hydrolase activity	-	C1
LOC_Os01g53990|13101.t04739	pectinesterase, putative, expressed	GO:0005618//cell wall	-	-	C1
LOC_Os01g54340|13101.t04772	plant-specific domain TIGR01615 family protein, expressed	-	-	-	C1
LOC_Os01g55030|13101.t04838	DNA-binding protein-related, putative, expressed	-	-	-	C1
LOC_Os01g55690|13101.t04902	glutelin, putative, expressed	-	GO:0003674//molecular_function	-	C1
LOC_Os01g56220|13101.t04953	expressed protein	-	-	-	C1
LOC_Os01g56880|13101.t05019	purple acid phosphatase precursor, putative, expressed	GO:0005618//cell wall	-	-	C1
LOC_Os01g59060|13101.t05222	50S ribosomal protein, putative, expressed	-	GO:0005198//structural molecule activity	-	C1
LOC_Os01g59350|13101.t05250	transcription factor, putative, expressed	-	GO:0003677//DNA binding	-	C1
LOC_Os01g59680|13101.t05281	NHL25, putative, expressed	-	-	-	C1
LOC_Os01g60730|13101.t05379	RING-H2 finger protein, putative, expressed	-	GO:0003824//catalytic activity	-	C1
LOC_Os01g60740|13101.t05380	LTPL16 - Protease inhibitor/seed storage/LTP family protein precursor, expressed	GO:0005886//plasma membrane	-	-	C1
LOC_Os01g60860|13101.t05391	spotted leaf 11, putative, expressed	-	-	-	C1
LOC_Os01g61080|13101.t05411	OsWRKY24 - Superfamily of TFs having WRKY and zinc finger domains, expressed	-	GO:0003700//sequence-specific DNA binding transcription factor activity	-	C1
LOC_Os01g62420|13101.t05541	triosephosphate isomerase, cytosolic, putative, expressed	-	GO:0003824//catalytic activity	-	C1
LOC_Os01g62900|13101.t05590	amino acid kinase, putative, expressed	-	-	GO:0006519//cellular amino acid and derivative metabolic process	C1
LOC_Os01g63580|13101.t05652	glycerol-3-phosphate acyltransferase, putative, expressed	-	-	-	C1
LOC_Os01g63690|13101.t05662	hs1, putative, expressed	-	-	-	C1
LOC_Os01g64256|13101.t05717	transposon protein, putative, Mutator sub-class, expressed	-	-	-	C1
LOC_Os01g64470|13101.t05739	harpin-induced protein 1 domain containing protein, expressed	GO:0005886//plasma membrane	-	-	C1
LOC_Os01g64640|13101.t05756	histone H3, putative, expressed	-	GO:0003677//DNA binding	-	C1
LOC_Os01g64900|13101.t05782	HEAT, putative, expressed	GO:0005739//mitochondrion	-	-	C1
LOC_Os01g65590|13101.t05846	galactosyltransferase, putative, expressed	-	GO:0016740//transferase activity	-	C1
LOC_Os01g65650|13101.t05852	receptor-like protein kinase HAIKU2 precursor, putative, expressed	-	GO:0000166//nucleotide binding	-	C1
LOC_Os01g66830|13101.t05965	pectinacetylesterase domain containing protein, expressed	GO:0005618//cell wall	-	-	C1
LOC_Os01g66850|13101.t05967	pectinacetylesterase domain containing protein, expressed	GO:0005618//cell wall	-	-	C1
LOC_Os01g67850|13101.t06066	zinc finger, RING-type, putative, expressed	-	GO:0005488//binding	-	C1
LOC_Os01g68650|13101.t06141	plant-specific domain TIGR01615 family protein, expressed	-	-	-	C1
LOC_Os01g68660|13101.t06142	cysteine proteinase inhibitor precursor protein, putative, expressed	-	-	-	C1
LOC_Os01g68950|13101.t06170	ubiquitin family domain containing protein, expressed	GO:0005634//nucleus	-	-	C1
LOC_Os01g69850|13101.t06209	OsMADS65 - MADS-box family gene with MIKC* type-box, expressed	-	GO:0003677//DNA binding	-	C1
LOC_Os01g69870|13101.t06210	expressed protein	-	-	-	C1
LOC_Os01g70080|13101.t06232	NB-ARC domain containing protein, expressed	-	GO:0005515//protein binding	-	C1
LOC_Os01g70560|13101.t06280	expressed protein	-	-	-	C1
LOC_Os01g70740|13101.t06298	expressed protein	-	-	-	C1
LOC_Os01g70790|13101.t06303	SRC2 protein, putative, expressed	-	-	-	C1
LOC_Os01g72530|13101.t06471	OsCML31 - Calmodulin-related calcium sensor protein, expressed	-	GO:0005488//binding	-	C1
LOC_Os01g74040|13101.t06619	zinc finger, RING-type, putative, expressed	-	GO:0003824//catalytic activity	-	C1
LOC_Os01g74370|13101.t06652	domain of unknown function DUF966 domain containing protein, expressed	-	-	-	C1
LOC_Os02g02400|13102.t00143	catalase isozyme A, putative, expressed	-	GO:0003824//catalytic activity	-	C1
LOC_Os02g02410|13102.t00144	DnaK family protein, putative, expressed	GO:0005739//mitochondrion	-	-	C1
LOC_Os02g03580|13102.t00259	transcription factor, putative, expressed	-	GO:0003677//DNA binding	-	C1
LOC_Os02g04520|13102.t00354	AGG2, putative, expressed	-	-	-	C1
LOC_Os02g05890|13102.t00493	EMB1303, putative, expressed	-	-	-	C1
LOC_Os02g06340|13102.t00539	EH domain-containing protein 1, putative, expressed	-	GO:0005488//binding	-	C1
LOC_Os02g06930|13102.t00599	protein kinase, putative, expressed	-	GO:0000166//nucleotide binding	-	C1
LOC_Os02g07180|13102.t00625	expressed protein	-	-	-	C1
LOC_Os02g07870|13102.t00695	ATP synthase, putative, expressed	-	GO:0000166//nucleotide binding	-	C1
LOC_Os02g09810|13102.t00838	amino acid transporter, putative, expressed	-	GO:0005215//transporter activity	-	C1
LOC_Os02g09960|13102.t00853	LYK8, putative, expressed	-	GO:0000166//nucleotide binding	-	C1
LOC_Os02g09980|13102.t00855	expressed protein	GO:0005634//nucleus	-	-	C1
LOC_Os02g09990|13102.t00856	expressed protein	-	-	-	C1
LOC_Os02g11070|13102.t00963	3-ketoacyl-CoA synthase, putative, expressed	-	-	-	C1
LOC_Os02g15280|13102.t01335	VQ domain containing protein, putative, expressed	-	-	-	C1
LOC_Os02g15810|13102.t01388	HMG1/2, putative, expressed	-	GO:0003700//sequence-specific DNA binding transcription factor activity	-	C1
LOC_Os02g16500|13102.t01457	expressed protein	-	GO:0003674//molecular_function	-	C1
LOC_Os02g16540|13102.t01461	OsWRKY39v2 - Superfamily of TFs having WRKY and zinc finger domains, expressed	-	GO:0003700//sequence-specific DNA binding transcription factor activity	-	C1
LOC_Os02g16630|13102.t01471	tryptophan biosynthesis protein trpCF, putative, expressed	-	GO:0003824//catalytic activity	-	C1
LOC_Os02g17280|13102.t01534	gamma-secretase subunit APH-1B, putative, expressed	-	-	-	C1
LOC_Os02g19820|13102.t01784	nodulin MtN3 family protein, putative, expressed	GO:0016020//membrane	-	-	C1
LOC_Os02g22020|13102.t01999	MYB family transcription factor, putative, expressed	-	GO:0003677//DNA binding	-	C1
LOC_Os02g25780|13102.t02287	expressed protein	-	-	-	C1
LOC_Os02g31030|13102.t02811	glycerophosphoryl diester phosphodiesterase family protein, putative, expressed	-	-	GO:0008152//metabolic process	C1
LOC_Os02g32580|13102.t02920	expressed protein	-	-	-	C1
LOC_Os02g32814|13102.t02942	heavy metal-associated domain containing protein, expressed	-	GO:0005488//binding	-	C1
LOC_Os02g32970|13102.t02956	hydrolase, alpha/beta fold family protein, putative, expressed	-	GO:0003824//catalytic activity	-	C1
LOC_Os02g33149|13102.t02974	OR, putative, expressed	-	-	GO:0006629//lipid metabolic process	C1
LOC_Os02g35900|13102.t03245	thioredoxin, putative, expressed	-	-	-	C1
LOC_Os02g36340|13102.t03288	riboflavin biosynthesis protein ribAB, chloroplast precursor, putative, expressed	-	GO:0003824//catalytic activity	-	C1
LOC_Os02g36700|13102.t03322	riboflavin biosynthesis protein ribAB, chloroplast precursor, putative, expressed	-	GO:0003824//catalytic activity	-	C1
LOC_Os02g37300|13102.t03382	heavy metal associated domain containing protein, expressed	-	-	-	C1
LOC_Os02g39850|13102.t03646	transferase family protein, putative, expressed	-	GO:0016740//transferase activity	-	C1
LOC_Os02g41510|13102.t03763	MYB family transcription factor, putative, expressed	-	GO:0003677//DNA binding	-	C1
LOC_Os02g41840|13102.t03797	DUF584 domain containing protein, putative, expressed	-	-	-	C1
LOC_Os02g41904|13102.t03804	DEF7 - Defensin and Defensin-like DEFL family	-	-	-	C1
LOC_Os02g41954|13102.t03809	gibberellin 2-beta-dioxygenase 7, putative, expressed	-	GO:0003824//catalytic activity	-	C1
LOC_Os02g42330|13102.t03845	nitrilase, putative, expressed	-	-	GO:0008152//metabolic process	C1
LOC_Os02g44230|13102.t04046	CPuORF22 - conserved peptide uORF-containing transcript, expressed	-	-	GO:0005975//carbohydrate metabolic process	C1
LOC_Os02g44870|13102.t04110	dehydrin, putative, expressed	-	-	GO:0006950//response to stress	C1
LOC_Os02g45450|13102.t04165	dehydration-responsive element-binding protein, putative, expressed	-	GO:0003677//DNA binding	-	C1
LOC_Os02g45780|13102.t04198	zinc finger, C3HC4 type domain containing protein, expressed	-	GO:0005488//binding	-	C1
LOC_Os02g45930|13102.t04213	expressed protein	-	-	-	C1
LOC_Os02g45940|13102.t04214	Core histone H2A/H2B/H3/H4 domain containing protein, putative, expressed	-	GO:0003677//DNA binding	-	C1
LOC_Os02g46210|13102.t04242	DUF581 domain containing protein, expressed	-	-	-	C1
LOC_Os02g46910|13102.t04311	glycosyl hydrolases family 16, putative, expressed	GO:0005618//cell wall	-	-	C1
LOC_Os02g47120|13102.t04332	region found in RelA/SpoT proteins containing protein, expressed	-	GO:0005488//binding	-	C1
LOC_Os02g47130|13102.t04333	expressed protein	-	-	-	C1
LOC_Os02g47180|13102.t04338	WD repeat-containing protein, putative, expressed	-	GO:0000166//nucleotide binding	-	C1
LOC_Os02g47310|13102.t04351	Cyclopropane-fatty-acyl-phospholipid synthase, putative, expressed	GO:0005783//endoplasmic reticulum	-	-	C1
LOC_Os02g47350|13102.t04355	oxidoreductase, short chain dehydrogenase/reductase family, putative, expressed	-	GO:0003824//catalytic activity	-	C1
LOC_Os02g48320|13102.t04457	DNA binding protein, putative, expressed	-	GO:0003674//molecular_function	-	C1
LOC_Os02g48360|13102.t04461	pyrophosphate--fructose 6-phosphate 1-phosphotransferase subunit alpha, putative, expressed	GO:0005575//cellular_component	-	-	C1
LOC_Os02g49370|13102.t04563	histone-like transcription factor and archaeal histone, putative, expressed	-	GO:0003677//DNA binding	-	C1
LOC_Os02g49840|13102.t04610	OsMADS57 - MADS-box family gene with MIKCc type-box, expressed	-	GO:0003677//DNA binding	-	C1
LOC_Os02g50040|13102.t04631	endoglucanase, putative, expressed	-	GO:0016787//hydrolase activity	-	C1
LOC_Os02g52210|13102.t04850	zinc finger, C3HC4 type domain containing protein, expressed	-	GO:0003824//catalytic activity	-	C1
LOC_Os02g52314|13102.t04860	BTB1 - Bric-a-Brac,Tramtrack, Broad Complex BTB domain, expressed	-	-	GO:0006950//response to stress	C1
LOC_Os02g53000|13102.t04927	lysM domain-containing GPI-anchored protein precursor, putative, expressed	-	-	GO:0009056//catabolic process	C1
LOC_Os02g53620|13102.t04988	nuclear transcription factor Y subunit, putative, expressed	-	GO:0003700//sequence-specific DNA binding transcription factor activity	-	C1
LOC_Os02g54060|13102.t05033	chaperonin, putative, expressed	-	GO:0005515//protein binding	-	C1
LOC_Os02g54254|13102.t05052	saccharopine dehydrogenase, putative, expressed	-	-	-	C1
LOC_Os02g54980|13102.t05123	pheophorbide a oxygenase, chloroplast precursor, putative, expressed	-	GO:0003674//molecular_function	-	C1
LOC_Os02g55910|13102.t05215	monogalactosyldiacylglycerol synthase, putative, expressed	-	-	GO:0006629//lipid metabolic process	C1
LOC_Os02g56920|13102.t05318	WAX2, putative, expressed	-	GO:0003824//catalytic activity	-	C1
LOC_Os02g57620|13102.t05387	Citrate transporter protein, putative, expressed	-	GO:0005215//transporter activity	-	C1
LOC_Os02g58260|13102.t05453	metallo-beta-lactamase family protein, putative, expressed	-	GO:0003824//catalytic activity	-	C1
LOC_Os03g01270|13103.t00029	expansin precursor, putative, expressed	-	GO:0003674//molecular_function	-	C1
LOC_Os03g02290|13103.t00128	kinesin motor domain containing protein, putative, expressed	-	GO:0003774//motor activity	-	C1
LOC_Os03g02550|13103.t00153	OsFBX76 - F-box domain containing protein, expressed	-	-	-	C1
LOC_Os03g02780|13103.t00177	Core histone H2A/H2B/H3/H4 domain containing protein, putative, expressed	-	GO:0003677//DNA binding	-	C1
LOC_Os03g03630|13103.t00251	expressed protein	-	-	-	C1
LOC_Os03g03724|13103.t00262	expressed protein	-	-	-	C1
LOC_Os03g04070|13103.t00294	no apical meristem protein, putative, expressed	-	-	GO:0007275//multicellular organismal development	C1
LOC_Os03g04100|13103.t00296	expressed protein	-	-	-	C1
LOC_Os03g04110|13103.t00298	lysM domain-containing GPI-anchored protein precursor, putative, expressed	-	-	GO:0009056//catabolic process	C1
LOC_Os03g04550|13103.t00338	expressed protein	-	-	-	C1
LOC_Os03g05334|13103.t00413	expressed protein	-	-	-	C1
LOC_Os03g05710|13103.t00451	acetyltransferase, GNAT family, putative, expressed	-	-	GO:0008152//metabolic process	C1
LOC_Os03g05750|13103.t00455	heavy-metal-associated domain-containing protein, putative, expressed	-	GO:0005488//binding	-	C1
LOC_Os03g06580|13103.t00535	MTN26L2 - MtN26 family protein precursor, expressed	GO:0016020//membrane	-	-	C1
LOC_Os03g06670|13103.t00542	Core histone H2A/H2B/H3/H4 domain containing protein, putative, expressed	-	-	-	C1
LOC_Os03g07380|13103.t00614	expressed protein	-	-	-	C1
LOC_Os03g07810|13103.t00655	expressed protein	-	-	-	C1
LOC_Os03g08470|13103.t00721	AP2 domain containing protein, expressed	-	GO:0003677//DNA binding	-	C1
LOC_Os03g09230|13103.t00793	LTPL69 - Protease inhibitor/seed storage/LTP family protein precursor, expressed	-	-	GO:0006810//transport	C1
LOC_Os03g10240|13103.t00843	DUF677 domain containing protein, putative, expressed	-	GO:0003674//molecular_function	-	C1
LOC_Os03g10620|13103.t00881	hydrolase, alpha/beta fold family domain containing protein, expressed	-	GO:0003824//catalytic activity	-	C1
LOC_Os03g10880|13103.t00908	BTBN5 - Bric-a-Brac, Tramtrack, Broad Complex BTB domain with non-phototropic hypocotyl 3 NPH3 and coiled-coil domains, expressed	-	-	-	C1
LOC_Os03g11500|13103.t00968	DUF647 domain containing protein, putative, expressed	GO:0005739//mitochondrion	-	-	C1
LOC_Os03g11734|13103.t00990	MATE efflux protein, putative, expressed	-	GO:0005215//transporter activity	-	C1
LOC_Os03g13300|13103.t01142	glutamate decarboxylase, putative, expressed	-	GO:0003824//catalytic activity	-	C1
LOC_Os03g14300|13103.t01241	THION29 - Plant thionin family protein precursor, expressed	-	-	-	C1
LOC_Os03g15270|13103.t01332	gibberellin receptor GID1L2, putative, expressed	-	-	-	C1
LOC_Os03g16670|13103.t01465	haloacid dehalogenase-like hydrolase family protein, putative, expressed	-	GO:0016787//hydrolase activity	-	C1
LOC_Os03g17690|13103.t01561	OsAPx1 - Cytosolic Ascorbate Peroxidase encoding gene 1-8, expressed	-	GO:0003824//catalytic activity	-	C1
LOC_Os03g17960|13103.t01588	expressed protein	-	-	-	C1
LOC_Os03g18770|13103.t01667	wound-induced protein WI12, putative, expressed	-	-	-	C1
LOC_Os03g19720|13103.t01761	EF hand family protein, putative, expressed	-	GO:0005488//binding	-	C1
LOC_Os03g20090|13103.t01796	MYB family transcription factor, putative, expressed	-	GO:0003677//DNA binding	-	C1
LOC_Os03g20700|13103.t01853	magnesium-chelatase, putative, expressed	GO:0005739//mitochondrion	-	-	C1
LOC_Os03g21640|13103.t01943	expressed protein	-	-	-	C1
LOC_Os03g22270|13103.t02007	auxin-repressed protein, putative, expressed	-	-	GO:0008150//biological_process	C1
LOC_Os03g22790|13103.t02057	beta-amylase, putative, expressed	-	GO:0016787//hydrolase activity	-	C1
LOC_Os03g28330|13103.t02530	sucrose synthase, putative, expressed	-	-	GO:0005975//carbohydrate metabolic process	C1
LOC_Os03g29190|13103.t02565	PDI, putative, expressed	-	-	-	C1
LOC_Os03g29250|13103.t02576	SPX domain-containing protein, putative, expressed	-	-	-	C1
LOC_Os03g31679|13103.t02790	annexin A7, putative, expressed	-	-	-	C1
LOC_Os03g37490|13103.t03219	MATE efflux family protein, putative, expressed	-	GO:0005215//transporter activity	-	C1
LOC_Os03g39000|13103.t03360	inositol-1-monophosphatase, putative, expressed	-	-	GO:0008152//metabolic process	C1
LOC_Os03g39020|13103.t03362	Kinesin motor domain domain containing protein, expressed	-	GO:0003774//motor activity	-	C1
LOC_Os03g40540|13103.t03495	cytochrome P450, putative, expressed	-	GO:0003824//catalytic activity	-	C1
LOC_Os03g44380|13103.t03830	9-cis-epoxycarotenoid dioxygenase 1, chloroplast precursor, putative, expressed	GO:0009536//plastid	-	-	C1
LOC_Os03g44540|13103.t03846	nuclear transcription factor Y subunit, putative, expressed	-	GO:0003700//sequence-specific DNA binding transcription factor activity	-	C1
LOC_Os03g44810|13103.t03869	expressed protein	-	-	-	C1
LOC_Os03g45280|13103.t03911	dehydrin, putative, expressed	-	-	-	C1
LOC_Os03g45760|13103.t03955	expressed protein	-	-	-	C1
LOC_Os03g46440|13103.t04018	BTBA4 - Bric-a-Brac,Tramtrack, Broad Complex BTB domain with Ankyrin repeat region, expressed	-	GO:0005515//protein binding	-	C1
LOC_Os03g46640|13103.t04037	deoxyuridine 5-triphosphate nucleotidohydrolase, putative, expressed	-	-	GO:0006139//nucleobase, nucleoside, nucleotide and nucleic acid metabolic process	C1
LOC_Os03g46920|13103.t04063	expressed protein	-	-	-	C1
LOC_Os03g47530|13103.t04120	glycosyl transferase 8 domain containing protein, putative, expressed	-	-	GO:0005975//carbohydrate metabolic process	C1
LOC_Os03g47980|13103.t04171	expressed protein	-	-	-	C1
LOC_Os03g48390|13103.t04210	expressed protein	-	-	-	C1
LOC_Os03g49440|13103.t04304	phosphatase, putative, expressed	-	GO:0016787//hydrolase activity	-	C1
LOC_Os03g51080|13103.t04448	glutamate decarboxylase, putative, expressed	-	GO:0003824//catalytic activity	-	C1
LOC_Os03g51390|13103.t04477	expressed protein	-	-	-	C1
LOC_Os03g52320|13103.t04564	GRF-interacting factor 1, putative, expressed	-	-	-	C1
LOC_Os03g52650|13103.t04593	syntaxin-related protein, putative, expressed	-	GO:0005515//protein binding	-	C1
LOC_Os03g52680|13103.t04596	expressed protein	-	-	-	C1
LOC_Os03g53020|13103.t04629	helix-loop-helix DNA-binding domain containing protein, expressed	-	GO:0003677//DNA binding	-	C1
LOC_Os03g53740|13103.t04698	expressed protein	-	-	-	C1
LOC_Os03g53930|13103.t04714	expressed protein	-	-	-	C1
LOC_Os03g55120|13103.t04782	plastocyanin-like domain containing protein, putative, expressed	-	GO:0005488//binding	-	C1
LOC_Os03g55240|13103.t04793	cytochrome P450, putative, expressed	-	GO:0003824//catalytic activity	-	C1
LOC_Os03g55540|13103.t04821	ZOS3-18 - C2H2 zinc finger protein, expressed	-	GO:0003676//nucleic acid binding	-	C1
LOC_Os03g55590|13103.t04825	MYB family transcription factor, putative, expressed	-	GO:0003677//DNA binding	-	C1
LOC_Os03g55776|13103.t04844	expressed protein	-	-	-	C1
LOC_Os03g56070|13103.t04872	expressed protein	-	-	-	C1
LOC_Os03g56590|13103.t04923	expressed protein	-	-	-	C1
LOC_Os03g57310|13103.t05005	syntaxin, putative, expressed	-	GO:0005515//protein binding	-	C1
LOC_Os03g58040|13103.t05072	glutamate dehydrogenase protein, putative, expressed	-	GO:0003824//catalytic activity	-	C1
LOC_Os03g58830|13103.t05143	BEE 1, putative, expressed	-	GO:0003677//DNA binding	-	C1
LOC_Os03g59300|13103.t05185	expressed protein	GO:0005618//cell wall	-	-	C1
LOC_Os03g60380|13103.t05286	cinnamoyl CoA reductase, putative, expressed	-	GO:0003824//catalytic activity	-	C1
LOC_Os03g60570|13103.t05305	ZOS3-22 - C2H2 zinc finger protein, expressed	-	GO:0003676//nucleic acid binding	-	C1
LOC_Os04g02530|13104.t00145	expressed protein	-	-	-	C1
LOC_Os04g08350|13104.t00699	cysteine synthase, chloroplast/chromoplast precursor, putative, expressed	-	GO:0003824//catalytic activity	-	C1
LOC_Os04g09800|13104.t00806	SWI/SNF-related matrix-associated actin-dependent regulator of chromatin subfamily A, putative	-	GO:0000166//nucleotide binding	-	C1
LOC_Os04g10460|13104.t00870	amidase, putative, expressed	-	GO:0016787//hydrolase activity	-	C1
LOC_Os04g15800|13104.t01327	expressed protein	-	-	-	C1
LOC_Os04g16450|13104.t01387	aquaporin protein, putative, expressed	-	GO:0005215//transporter activity	-	C1
LOC_Os04g19960|13104.t01722	retrotransposon protein, putative, unclassified, expressed	-	-	-	C1
LOC_Os04g22290|13104.t01944	hypothetical protein	-	-	-	C1
LOC_Os04g23550|13104.t02064	basic helix-loop-helix family protein, putative, expressed	-	GO:0003677//DNA binding	-	C1
LOC_Os04g29274|13104.t02601	expressed protein	-	-	-	C1
LOC_Os04g30420|13104.t02709	dehydrogenase, putative, expressed	-	GO:0003824//catalytic activity	-	C1
LOC_Os04g31524|13104.t02814	expressed protein	-	-	-	C1
LOC_Os04g31924|13104.t02852	nodulin, putative, expressed	-	-	-	C1
LOC_Os04g32540|13104.t02910	OsSCP24 - Putative Serine Carboxypeptidase homologue, expressed	-	-	GO:0009987//cellular process	C1
LOC_Os04g33740|13104.t03030	glycosyl hydrolases, putative, expressed	-	GO:0016787//hydrolase activity	-	C1
LOC_Os04g33820|13104.t03038	OsFBX132 - F-box domain containing protein, expressed	-	-	-	C1
LOC_Os04g40630|13104.t03606	BTBZ4 - Bric-a-Brac, Tramtrack, Broad Complex BTB domain with TAZ zinc finger and Calmodulin-binding domains, expressed	-	GO:0005515//protein binding	-	C1
LOC_Os04g40730|13104.t03615	oxidoreductase, short chain dehydrogenase/reductase family, putative, expressed	-	GO:0003824//catalytic activity	-	C1
LOC_Os04g40950|13104.t03638	glyceraldehyde-3-phosphate dehydrogenase, putative, expressed	-	GO:0003824//catalytic activity	-	C1
LOC_Os04g41900|13104.t03730	expressed protein	-	-	-	C1
LOC_Os04g42860|13104.t03817	GDSL-like lipase/acylhydrolase, putative, expressed	-	-	GO:0000003//reproduction	C1
LOC_Os04g43230|13104.t03854	expressed protein	-	-	-	C1
LOC_Os04g44510|13104.t03977	GEM, putative, expressed	-	-	-	C1
LOC_Os04g45610|13104.t04083	expressed protein	-	-	-	C1
LOC_Os04g45970|13104.t04116	glutamate dehydrogenase protein, putative, expressed	-	GO:0003824//catalytic activity	-	C1
LOC_Os04g46280|13104.t04144	hydrolase, NUDIX family, domain containing protein, expressed	-	GO:0003824//catalytic activity	-	C1
LOC_Os04g46980|13104.t04217	cis-zeatin O-glucosyltransferase, putative, expressed	-	-	GO:0006519//cellular amino acid and derivative metabolic process	C1
LOC_Os04g47220|13104.t04239	aquaporin protein, putative, expressed	-	GO:0005215//transporter activity	-	C1
LOC_Os04g47330|13104.t04249	rho-GTPase-activating protein-related, putative, expressed	-	-	-	C1
LOC_Os04g47580|13104.t04272	cyclin, putative, expressed	-	-	GO:0007049//cell cycle	C1
LOC_Os04g48270|13104.t04337	OsFBX148 - F-box domain containing protein, expressed	-	-	-	C1
LOC_Os04g48350|13104.t04344	dehydration-responsive element-binding protein, putative, expressed	-	GO:0003677//DNA binding	-	C1
LOC_Os04g49370|13104.t04446	expressed protein	-	-	-	C1
LOC_Os04g49450|13104.t04453	MYB family transcription factor, putative, expressed	-	GO:0003677//DNA binding	-	C1
LOC_Os04g49550|13104.t04462	RING-H2 finger protein ATL2A, putative, expressed	-	GO:0003824//catalytic activity	-	C1
LOC_Os04g50700|13104.t04544	pathogenesis-related Bet v I family protein, putative, expressed	-	-	-	C1
LOC_Os04g51090|13104.t04584	tRNA-splicing endonuclease positive effector-related, putative, expressed	-	GO:0003677//DNA binding	-	C1
LOC_Os04g51130|13104.t04588	expressed protein	-	GO:0003700//sequence-specific DNA binding transcription factor activity	-	C1
LOC_Os04g51460|13104.t04624	glycosyl hydrolases family 16, putative, expressed	GO:0005618//cell wall	-	-	C1
LOC_Os04g52260|13104.t04703	LTPL124 - Protease inhibitor/seed storage/LTP family protein precursor, expressed	-	-	GO:0006810//transport	C1
LOC_Os04g52370|13104.t04714	UTP--glucose-1-phosphate uridylyltransferase, putative, expressed	-	-	GO:0008152//metabolic process	C1
LOC_Os04g53950|13104.t04874	glycosyl hydrolases family 16 protein, protein, expressed	GO:0005618//cell wall	-	-	C1
LOC_Os04g54210|13104.t04902	hypothetical protein	-	-	-	C1
LOC_Os04g55120|13104.t04990	jp18, putative, expressed	-	-	-	C1
LOC_Os04g55410|13104.t05019	FGGY family of carbohydrate kinases, putative, expressed	-	-	GO:0005975//carbohydrate metabolic process	C1
LOC_Os04g56230|13104.t05100	polyprenyl synthetase, putative, expressed	-	-	GO:0006629//lipid metabolic process	C1
LOC_Os04g56240|13104.t05101	lipase, putative, expressed	-	-	GO:0006629//lipid metabolic process	C1
LOC_Os04g56400|13104.t05117	glutamine synthetase, catalytic domain containing protein, expressed	-	GO:0003824//catalytic activity	-	C1
LOC_Os04g58890|13104.t05363	expressed protein	-	-	-	C1
LOC_Os05g01970|13105.t00097	NAD dependent epimerase/dehydratase family protein, putative, expressed	GO:0009536//plastid	-	-	C1
LOC_Os05g02060|13105.t00106	mitochondrial import inner membrane translocase subunit Tim17, putative, expressed	-	GO:0005215//transporter activity	-	C1
LOC_Os05g02070|13105.t00107	expressed protein	-	-	-	C1
LOC_Os05g02300|13105.t00130	Core histone H2A/H2B/H3/H4 domain containing protein, putative, expressed	-	-	-	C1
LOC_Os05g03620|13105.t00259	TKL_IRAK_CR4L.4 - The CR4L subfamily has homology with Crinkly4, expressed	-	GO:0000166//nucleotide binding	-	C1
LOC_Os05g06440|13105.t00539	dnaJ homolog subfamily B member 11 precursor, putative, expressed	GO:0005739//mitochondrion	-	-	C1
LOC_Os05g07220|13105.t00614	kelch repeat-containing protein, putative, expressed	-	-	-	C1
LOC_Os05g08420|13105.t00730	expressed protein	-	-	-	C1
LOC_Os05g09500|13105.t00836	hexokinase, putative, expressed	-	GO:0000166//nucleotide binding	-	C1
LOC_Os05g13580|13105.t01153	OsCML18 - Calmodulin-related calcium sensor protein, expressed	-	GO:0005488//binding	-	C1
LOC_Os05g15510|13105.t01344	cellulase, putative, expressed	-	-	-	C1
LOC_Os05g25770|13105.t02258	OsWRKY45 - Superfamily of TFs having WRKY and zinc finger domains, expressed	-	GO:0003677//DNA binding	-	C1
LOC_Os05g27090|13105.t02390	basic helix-loop-helix domain containing protein, expressed	-	-	-	C1
LOC_Os05g29010|13105.t02575	POLA4 - Putative DNA polymerase alpha complex subunit, expressed	-	-	-	C1
LOC_Os05g30860|13105.t02711	expressed protein	-	-	-	C1
LOC_Os05g31280|13105.t02748	GASR5 - Gibberellin-regulated GASA/GAST/Snakin family protein precursor, expressed	GO:0005618//cell wall	-	-	C1
LOC_Os05g31620|13105.t02783	OsCML15 - Calmodulin-related calcium sensor protein, expressed	-	GO:0005488//binding	-	C1
LOC_Os05g33400|13105.t02961	basic 7S globulin precursor, putative, expressed	GO:0005618//cell wall	-	-	C1
LOC_Os05g33460|13105.t02967	mTERF domain containing protein, expressed	GO:0005739//mitochondrion	-	-	C1
LOC_Os05g33690|13105.t02991	receptor-like protein kinase precursor, putative, expressed	-	GO:0000166//nucleotide binding	-	C1
LOC_Os05g33820|13105.t03004	lipase, putative, expressed	-	-	-	C1
LOC_Os05g35140|13105.t03136	nodulin MtN3 family protein, putative, expressed	GO:0016020//membrane	-	-	C1
LOC_Os05g35500|13105.t03173	MYB family transcription factor, putative, expressed	-	GO:0003677//DNA binding	-	C1
LOC_Os05g36270|13105.t03248	fructose-1,6-bisphosphatase, putative, expressed	-	-	GO:0005975//carbohydrate metabolic process	C1
LOC_Os05g36280|13105.t03249	histone H3, putative, expressed	-	GO:0003677//DNA binding	-	C1
LOC_Os05g39230|13105.t03497	low photochemical bleaching 1 protein, putative, expressed	-	-	-	C1
LOC_Os05g39720|13105.t03546	OsWRKY70 - Superfamily of TFs having WRKY and zinc finger domains, expressed	-	GO:0003700//sequence-specific DNA binding transcription factor activity	-	C1
LOC_Os05g41390|13105.t03711	cyclin, putative, expressed	-	-	GO:0007049//cell cycle	C1
LOC_Os05g41670|13105.t03739	ICE-like protease p20 domain containing protein, putative, expressed	-	-	GO:0009987//cellular process	C1
LOC_Os05g41760|13105.t03748	AP2 domain containing protein, expressed	-	GO:0003677//DNA binding	-	C1
LOC_Os05g43170|13105.t03844	calreticulin precursor protein, putative, expressed	-	GO:0005488//binding	-	C1
LOC_Os05g44060|13105.t03932	expressed protein	-	-	-	C1
LOC_Os05g44290|13105.t03955	protein kinase domain containing protein, expressed	-	GO:0000166//nucleotide binding	-	C1
LOC_Os05g45030|13105.t04031	calcium homeostasis regulator CHoR1, putative, expressed	GO:0005739//mitochondrion	-	-	C1
LOC_Os05g45460|13105.t04074	POEI52 - Pollen Ole e I allergen and extensin family protein precursor, expressed	-	-	-	C1
LOC_Os05g45740|13105.t04102	mitochondrial ATP synthase g subunit family protein, putative, expressed	-	-	GO:0006810//transport	C1
LOC_Os05g46760|13105.t04205	STE_MEKK_ste11_MAP3K.19 - STE kinases include homologs to sterile 7, sterile 11 and sterile 20 from yeast, expressed	-	GO:0003677//DNA binding	-	C1
LOC_Os05g47540|13105.t04236	CPuORF26 - conserved peptide uORF-containing transcript, expressed	-	GO:0016740//transferase activity	-	C1
LOC_Os05g47960|13105.t04276	expressed protein	-	-	-	C1
LOC_Os05g48930|13105.t04373	OsGrx_S2 - glutaredoxin subgroup III, expressed	-	-	-	C1
LOC_Os05g49060|13105.t04386	uncharacterized protein ycf23, putative, expressed	-	-	-	C1
LOC_Os05g49160|13105.t04396	expressed protein	-	-	-	C1
LOC_Os05g49860|13105.t04467	Core histone H2A/H2B/H3/H4 domain containing protein, putative, expressed	-	GO:0003677//DNA binding	-	C1
LOC_Os05g50750|13105.t04557	AAA family ATPase, putative, expressed	-	GO:0000166//nucleotide binding	-	C1
LOC_Os06g03710|13106.t00261	DELLA protein SLR1, putative, expressed	-	GO:0003700//sequence-specific DNA binding transcription factor activity	-	C1
LOC_Os06g03930|13106.t00281	cytochrome P450 86A1, putative, expressed	-	GO:0003824//catalytic activity	-	C1
LOC_Os06g04230|13106.t00308	expressed protein	-	-	-	C1
LOC_Os06g04240|13106.t00309	expressed protein	-	-	-	C1
LOC_Os06g04800|13106.t00364	peptidase, T1 family, putative, expressed	GO:0005829//cytosol	-	-	C1
LOC_Os06g05740|13106.t00459	expressed protein	GO:0005783//endoplasmic reticulum	-	-	C1
LOC_Os06g05860|13106.t00472	6-phosphofructokinase, putative, expressed	GO:0005575//cellular_component	-	-	C1
LOC_Os06g06350|13106.t00521	AMP-binding enzyme, putative, expressed	-	GO:0000166//nucleotide binding	-	C1
LOC_Os06g06460|13106.t00532	histone H3, putative, expressed	-	GO:0003677//DNA binding	-	C1
LOC_Os06g07600|13106.t00643	uncharacterized glycosyltransferase, putative, expressed	-	GO:0016787//hydrolase activity	-	C1
LOC_Os06g08440|13106.t00723	two-component response regulator, putative, expressed	-	GO:0003677//DNA binding	-	C1
LOC_Os06g10650|13106.t00939	tyrosine phosphatase family protein, putative, expressed	-	GO:0003824//catalytic activity	-	C1
LOC_Os06g12150|13106.t01090	shikimate kinase, putative, expressed	-	-	GO:0006519//cellular amino acid and derivative metabolic process	C1
LOC_Os06g14420|13106.t01316	hydrolase, NUDIX family, domain containing protein, expressed	-	GO:0016787//hydrolase activity	-	C1
LOC_Os06g14460|13106.t01320	chromosome condensation protein like, putative, expressed	-	-	-	C1
LOC_Os06g19444|13106.t01764	CCT/B-box zinc finger protein, putative, expressed	-	GO:0003700//sequence-specific DNA binding transcription factor activity	-	C1
LOC_Os06g22060|13106.t02022	pyrophosphate--fructose 6-phosphate 1-phosphotransferase subunit alpha, putative, expressed	GO:0005575//cellular_component	-	-	C1
LOC_Os06g22919|13106.t02107	DEFL9 - Defensin and Defensin-like DEFL family, expressed	GO:0005618//cell wall	-	-	C1
LOC_Os06g22960|13106.t02110	aquaporin protein, putative, expressed	-	GO:0005215//transporter activity	-	C1
LOC_Os06g34780|13106.t03154	expressed protein	-	GO:0005198//structural molecule activity	-	C1
LOC_Os06g36560|13106.t03331	inositol oxygenase, putative, expressed	-	GO:0003824//catalytic activity	-	C1
LOC_Os06g38294|13106.t03499	peptide transporter PTR2, putative, expressed	-	GO:0005215//transporter activity	-	C1
LOC_Os06g39140|13106.t03585	hemoglobin-like protein HbO, putative, expressed	-	-	-	C1
LOC_Os06g39370|13106.t03607	OsFBK16 - F-box domain and kelch repeat containing protein, expressed	-	-	-	C1
LOC_Os06g41030|13106.t03775	DUF1680 domain containing protein, putative, expressed	-	-	-	C1
LOC_Os06g42020|13106.t03872	CSLA9 - cellulose synthase-like family A, expressed	GO:0005794//Golgi apparatus	-	-	C1
LOC_Os06g42660|13106.t03938	expressed protein	-	-	-	C1
LOC_Os06g43044|13106.t03974	GDSL-like lipase/acylhydrolase, putative, expressed	-	-	GO:0000003//reproduction	C1
LOC_Os06g43600|13106.t04026	LTPL129 - Protease inhibitor/seed storage/LTP family protein precursor, expressed	-	-	GO:0006810//transport	C1
LOC_Os06g43810|13106.t04047	expressed protein	-	-	-	C1
LOC_Os06g44080|13106.t04075	ubiquitin family protein, putative, expressed	-	GO:0005515//protein binding	-	C1
LOC_Os06g45090|13106.t04178	expressed protein	-	-	-	C1
LOC_Os06g45140|13106.t04183	bZIP transcription factor domain containing protein, expressed	-	GO:0003677//DNA binding	-	C1
LOC_Os06g45640|13106.t04234	core histone H2A/H2B/H3/H4, putative, expressed	-	GO:0003677//DNA binding	-	C1
LOC_Os06g45990|13106.t04269	patellin-5, putative, expressed	-	GO:0005215//transporter activity	-	C1
LOC_Os06g46140|13106.t04285	expressed protein	-	-	-	C1
LOC_Os06g46284|13106.t04297	glycosyl hydrolase, family 31, putative, expressed	GO:0005783//endoplasmic reticulum	-	-	C1
LOC_Os06g46340|13106.t04301	glycosyl hydrolase, family 31, putative, expressed	GO:0005783//endoplasmic reticulum	-	-	C1
LOC_Os06g47250|13106.t04391	DUF292 domain containing protein, expressed	-	GO:0003674//molecular_function	-	C1
LOC_Os06g48600|13106.t04528	macrophage migration inhibitory factor, putative, expressed	-	-	GO:0006950//response to stress	C1
LOC_Os06g49760|13106.t04645	invertase/pectin methylesterase inhibitor family protein, putative, expressed	-	GO:0030234//enzyme regulator activity	-	C1
LOC_Os06g50230|13106.t04692	expressed protein	-	-	-	C1
LOC_Os07g02790|13107.t00176	expressed protein	-	-	-	C1
LOC_Os07g04500|13107.t00344	expressed protein	-	-	-	C1
LOC_Os07g05040|13107.t00396	cadmium-induced protein, putative, expressed	-	-	-	C1
LOC_Os07g05390|13107.t00432	expressed protein	GO:0005739//mitochondrion	-	-	C1
LOC_Os07g05820|13107.t00475	hydroxyacid oxidase 1, putative, expressed	-	GO:0003824//catalytic activity	-	C1
LOC_Os07g07930|13107.t00677	LTPL78 - Protease inhibitor/seed storage/LTP family protein precursor, expressed	-	-	GO:0006810//transport	C1
LOC_Os07g08500|13107.t00729	C-5 cytosine-specific DNA methylase, putative, expressed	-	-	GO:0006259//DNA metabolic process	C1
LOC_Os07g09060|13107.t00784	aldehyde dehydrogenase, putative, expressed	-	GO:0003824//catalytic activity	-	C1
LOC_Os07g10460|13107.t00923	5-nucleotidase surE, putative, expressed	-	GO:0016787//hydrolase activity	-	C1
LOC_Os07g10810|13107.t00959	conserved hypothetical protein	-	-	-	C1
LOC_Os07g12340|13107.t01108	NAC domain-containing protein 67, putative, expressed	-	GO:0003700//sequence-specific DNA binding transcription factor activity	-	C1
LOC_Os07g14150|13107.t01282	cytidine deaminase, putative, expressed	-	GO:0005488//binding	-	C1
LOC_Os07g14270|13107.t01294	calreticulin precursor protein, putative, expressed	-	GO:0005488//binding	-	C1
LOC_Os07g14350|13107.t01302	methyltransferase, putative, expressed	-	-	-	C1
LOC_Os07g18750|13107.t01739	LTPL42 - Protease inhibitor/seed storage/LTP family protein precursor, expressed	-	-	GO:0006810//transport	C1
LOC_Os07g22400|13107.t01945	POLA3 - Putative DNA polymerase alpha complex subunit, expressed	-	GO:0016740//transferase activity	-	C1
LOC_Os07g22580|13107.t01961	rhoGAP domain containing protein, expressed	-	GO:0030234//enzyme regulator activity	-	C1
LOC_Os07g23570|13107.t02050	cytochrome P450 72A1, putative, expressed	GO:0005783//endoplasmic reticulum	-	-	C1
LOC_Os07g32600|13107.t02931	glucan endo-1,3-beta-glucosidase precursor, putative, expressed	GO:0005634//nucleus	-	-	C1
LOC_Os07g32680|13107.t02939	retrotransposon protein, putative, unclassified, expressed	-	-	-	C1
LOC_Os07g33240|13107.t02993	endoribonuclease, putative, expressed	-	GO:0004518//nuclease activity	-	C1
LOC_Os07g36170|13107.t03275	chitin-inducible gibberellin-responsive protein, putative, expressed	-	GO:0003700//sequence-specific DNA binding transcription factor activity	-	C1
LOC_Os07g36500|13107.t03306	Core histone H2A/H2B/H3/H4 domain containing protein, putative, expressed	-	GO:0003677//DNA binding	-	C1
LOC_Os07g37030|13107.t03356	cytochrome b6-f complex iron-sulfur subunit, chloroplast precursor, putative, expressed	-	-	GO:0006091//generation of precursor metabolites and energy	C1
LOC_Os07g37400|13107.t03393	OsFBX257 - F-box domain containing protein, expressed	-	-	-	C1
LOC_Os07g37454|13107.t03398	urate anion exchanger, putative, expressed	-	-	-	C1
LOC_Os07g39980|13107.t03648	GA22009-PA, putative, expressed	-	-	-	C1
LOC_Os07g41200|13107.t03762	expressed protein	-	-	-	C1
LOC_Os07g41240|13107.t03766	cytochrome P450, putative, expressed	-	GO:0003824//catalytic activity	-	C1
LOC_Os07g41280|13107.t03770	6-phosphogluconolactonase, putative, expressed	-	GO:0003824//catalytic activity	-	C1
LOC_Os07g42324|13107.t03871	hypothetical protein	-	-	-	C1
LOC_Os07g43170|13107.t03953	adenylate kinase, putative, expressed	GO:0005634//nucleus	-	-	C1
LOC_Os07g43540|13107.t03990	ORC6 - Putative origin recognition complex subunit 6, expressed	-	-	-	C1
LOC_Os07g44140|13107.t04046	cytochrome P450 72A1, putative, expressed	GO:0005783//endoplasmic reticulum	-	-	C1
LOC_Os07g44180|13107.t04049	OsRCI2-10 - Hydrophobic protein LTI6A, expressed	-	-	GO:0006950//response to stress	C1
LOC_Os07g46480|13107.t04275	eukaryotic aspartyl protease domain containing protein, expressed	-	GO:0003677//DNA binding	-	C1
LOC_Os07g46560|13107.t04284	seven in absentia protein family domain containing protein, expressed	GO:0005634//nucleus	-	-	C1
LOC_Os07g47960|13107.t04426	basic helix-loop-helix domain containing protein, expressed	-	-	-	C1
LOC_Os07g48280|13107.t04456	expressed protein	-	-	-	C1
LOC_Os07g48460|13107.t04474	stress responsive protein, putative, expressed	-	-	-	C1
LOC_Os07g48510|13107.t04479	thioredoxin, putative, expressed	-	-	-	C1
LOC_Os07g48710|13107.t04499	VQ domain containing protein, putative, expressed	-	-	-	C1
LOC_Os08g01610|13108.t00063	DUF250 domain containing protein, putative, expressed	-	GO:0005215//transporter activity	-	C1
LOC_Os08g01760|13108.t00078	dehydrogenase, putative, expressed	-	GO:0005488//binding	-	C1
LOC_Os08g04460|13108.t00347	NADPH-dependent FMN reductase domain containing protein, expressed	GO:0005886//plasma membrane	-	-	C1
LOC_Os08g05530|13108.t00453	LSM domain containing protein, expressed	GO:0005634//nucleus	-	-	C1
LOC_Os08g10500|13108.t00942	hypothetical protein	-	-	-	C1
LOC_Os08g10510|13108.t00943	aminotransferase, putative, expressed	GO:0005739//mitochondrion	-	-	C1
LOC_Os08g13920|13108.t01280	glycosyl hydrolases family 16, putative, expressed	GO:0005618//cell wall	-	-	C1
LOC_Os08g14400|13108.t01324	homeobox domain containing protein, expressed	-	GO:0003677//DNA binding	-	C1
LOC_Os08g17160|13108.t01596	plastocyanin-like domain containing protein, putative, expressed	-	GO:0005488//binding	-	C1
LOC_Os08g17680|13108.t01644	stromal cell-derived factor 2-like protein precursor, putative, expressed	-	-	-	C1
LOC_Os08g18920|13108.t01715	protein kinase domain containing protein, expressed	-	GO:0000166//nucleotide binding	-	C1
LOC_Os08g19670|13108.t01791	expressed protein	-	-	-	C1
LOC_Os08g21541|13108.t01952	expressed protein	-	-	-	C1
LOC_Os08g27824|13108.t02546	NOL1/NOP2/sun family protein, putative, expressed	GO:0005730//nucleolus	-	-	C1
LOC_Os08g29110|13108.t02673	thioredoxin, putative, expressed	-	-	-	C1
LOC_Os08g31850|13108.t02936	expressed protein	-	-	-	C1
LOC_Os08g31980|13108.t02949	trehalose-6-phosphate synthase, putative, expressed	GO:0005739//mitochondrion	-	-	C1
LOC_Os08g32600|13108.t03012	STE_MEKK_ste11_MAP3K.21 - STE kinases include homologs to sterile 7, sterile 11 and sterile 20 from yeast, expressed	-	GO:0003677//DNA binding	-	C1
LOC_Os08g32910|13108.t03041	expressed protein	-	-	-	C1
LOC_Os08g33100|13108.t03061	core histone H2A/H2B/H3/H4, putative, expressed	-	-	-	C1
LOC_Os08g35190|13108.t03269	auxin-repressed protein, putative, expressed	-	-	GO:0008150//biological_process	C1
LOC_Os08g36910|13108.t03439	alpha-amylase precursor, putative, expressed	-	-	-	C1
LOC_Os08g36920|13108.t03440	AP2 domain containing protein, expressed	-	GO:0003677//DNA binding	-	C1
LOC_Os08g37432|13108.t03491	MATE efflux family protein, putative, expressed	-	GO:0005215//transporter activity	-	C1
LOC_Os08g37660|13108.t03513	plastocyanin-like domain containing protein, putative, expressed	-	GO:0005488//binding	-	C1
LOC_Os08g38710|13108.t03616	uncharacterized glycosyltransferase, putative, expressed	-	GO:0016787//hydrolase activity	-	C1
LOC_Os08g39694|13108.t03712	cytochrome P450, putative, expressed	-	GO:0003824//catalytic activity	-	C1
LOC_Os08g40620|13108.t03804	rabGAP/TBC domain-containing protein, putative, expressed	-	-	-	C1
LOC_Os08g41280|13108.t03869	membrane protein, putative, expressed	-	GO:0005198//structural molecule activity	-	C1
LOC_Os08g41440|13108.t03885	UDP-glucuronate 4-epimerase, putative, expressed	-	GO:0003824//catalytic activity	-	C1
LOC_Os08g42470|13108.t03987	BEE 1, putative, expressed	-	GO:0003677//DNA binding	-	C1
LOC_Os08g43730|13108.t04110	DUF630/DUF632 domains containing protein, putative, expressed	-	-	-	C1
LOC_Os08g44270|13108.t04161	vignain precursor, putative, expressed	-	-	GO:0006950//response to stress	C1
LOC_Os08g44850|13108.t04218	C2 domain containing protein, putative, expressed	-	-	-	C1
LOC_Os08g45140|13108.t04246	OsGrx_S12 - glutaredoxin subgroup I, expressed	-	GO:0003824//catalytic activity	-	C1
LOC_Os09g03960|13109.t00295	expressed protein	-	-	-	C1
LOC_Os09g04160|13109.t00315	expressed protein	-	-	-
LOC_Os09g06740|13109.t00469	zinc finger, C3HC4 type domain containing protein, expressed	-	GO:0003824//catalytic activity	-	C1
LOC_Os09g06770|13109.t00472	RING finger protein, putative, expressed	-	-	-	C1
LOC_Os09g07154|13109.t00511	hypothetical protein	-	-	-	C1
LOC_Os09g11440|13109.t00939	expressed protein	-	GO:0003674//molecular_function	-	C1
LOC_Os09g12600|13109.t01055	phosphate/phosphate translocator, putative, expressed	-	GO:0005215//transporter activity	-	C1
LOC_Os09g13920|13109.t01184	expressed protein	-	-	-	C1
LOC_Os09g15700|13109.t01367	receptor-like protein kinase 5 precursor, putative, expressed	-	GO:0000166//nucleotide binding	-	C1
LOC_Os09g16510|13109.t01447	OsWRKY74 - Superfamily of TFs having WRKY and zinc finger domains, expressed	-	GO:0003677//DNA binding	-	C1
LOC_Os09g16520|13109.t01448	cytochrome b5-like Heme/Steroid binding domain containing protein, expressed	-	-	GO:0009607//response to biotic stimulus	C1
LOC_Os09g21120|13109.t01851	armadillo/beta-catenin repeat family protein, putative, expressed	-	-	-	C1
LOC_Os09g23220|13109.t02011	glycosyl hydrolases family 16, putative, expressed	GO:0005618//cell wall	-	-	C1
LOC_Os09g23300|13109.t02019	integral membrane protein, putative, expressed	-	-	-	C1
LOC_Os09g26160|13109.t02301	glutamate receptor, putative, expressed	-	-	GO:0009607//response to biotic stimulus	C1
LOC_Os09g26900|13109.t02375	ctr copper transporter family protein, putative, expressed	-	GO:0005215//transporter activity	-	C1
LOC_Os09g27330|13109.t02419	oxidoreductase/ transition metal ion binding protein, putative, expressed	-	-	-	C1
LOC_Os09g27820|13109.t02470	1-aminocyclopropane-1-carboxylate oxidase protein, putative, expressed	-	GO:0003824//catalytic activity	-	C1
LOC_Os09g27830|13109.t02471	OsPDIL2-3 protein disulfide isomerase PDIL2-3, expressed	-	GO:0003824//catalytic activity	-	C1
LOC_Os09g28420|13109.t02527	alpha-amylase precursor, putative, expressed	-	-	-	C1
LOC_Os09g28440|13109.t02529	AP2 domain containing protein, expressed	-	GO:0003677//DNA binding	-	C1
LOC_Os09g28520|13109.t02537	expressed protein	-	-	-	C1
LOC_Os09g30160|13109.t02694	zinc finger, C3HC4 type domain containing protein, expressed	-	GO:0005488//binding	-	C1
LOC_Os09g30190|13109.t02697	receptor-like protein kinase 2 precursor, putative, expressed	-	GO:0000166//nucleotide binding	-	C1
LOC_Os09g31080|13109.t02752	induced stolen tip protein TUB8, putative, expressed	-	-	-	C1
LOC_Os09g31490|13109.t02801	reductase, putative, expressed	-	GO:0003824//catalytic activity	-	C1
LOC_Os09g32988|13109.t02922	POEI18 - Pollen Ole e I allergen and extensin family protein precursor, expressed	-	-	-	C1
LOC_Os09g35910|13109.t03075	homeobox associated leucine zipper, putative, expressed	-	GO:0003677//DNA binding	-	C1
LOC_Os09g36740|13109.t03159	tetratricopeptide repeat domain containing protein, expressed	-	-	-	C1
LOC_Os09g37080|13109.t03193	expressed protein	-	-	-	C1
LOC_Os09g38777|13109.t03361	MOSC domain-containing protein, mitochondrial precursor, putative, expressed	-	GO:0003824//catalytic activity	-	C1
LOC_Os09g39440|13109.t03428	inosine-uridine preferring nucleoside hydrolase family protein, putative, expressed	-	GO:0016787//hydrolase activity	-	C1
LOC_Os10g07998|13110.t00615	nodulin, putative, expressed	GO:0016020//membrane	-	-	C1
LOC_Os10g14020|13110.t01121	TPD1, putative, expressed	-	-	-	C1
LOC_Os10g14180|13110.t01134	expressed protein	-	-	-	C1
LOC_Os10g20450|13110.t01534	MATE efflux family protein, putative, expressed	-	GO:0005215//transporter activity	-	C1
LOC_Os10g21190|13110.t01605	expressed protein	-	-	-	C1
LOC_Os10g24954|13110.t01914	ulp1 protease family, C-terminal catalytic domain containing protein	-	-	GO:0009987//cellular process	C1
LOC_Os10g25000|13110.t01917	expressed protein	-	-	-	C1
LOC_Os10g28230|13110.t02172	Core histone H2A/H2B/H3/H4 domain containing protein, putative, expressed	-	-	-	C1
LOC_Os10g28240|13110.t02173	calcium-transporting ATPase, plasma membrane-type, putative, expressed	-	GO:0005215//transporter activity	-	C1
LOC_Os10g31540|13110.t02473	glycine-rich cell wall structural protein 2 precursor, putative, expressed	-	-	-	C1
LOC_Os10g31850|13110.t02504	RING finger and CHY zinc finger domain-containing protein 1, putative, expressed	-	GO:0005488//binding	-	C1
LOC_Os10g33040|13110.t02603	receptor-like protein kinase precursor, putative, expressed	-	GO:0000166//nucleotide binding	-	C1
LOC_Os10g35060|13110.t02795	Ser/Thr protein phosphatase family protein, putative, expressed	-	-	-	C1
LOC_Os10g35460|13110.t02837	COBRA, putative, expressed	GO:0016020//membrane	-	-	C1
LOC_Os10g35580|13110.t02849	ATEB1A-like microtubule associated protein, putative, expressed	-	GO:0005515//protein binding	-	C1
LOC_Os10g35840|13110.t02872	shikimate/quinate 5-dehydrogenase, putative, expressed	-	GO:0003824//catalytic activity	-	C1
LOC_Os10g39140|13110.t03154	flavonol synthase/flavanone 3-hydroxylase, putative, expressed	-	GO:0003824//catalytic activity	-	C1
LOC_Os10g39660|13110.t03203	expressed protein	-	-	-	C1
LOC_Os10g39750|13110.t03213	inducer of CBF expression 2, putative, expressed	-	GO:0003677//DNA binding	-	C1
LOC_Os10g40360|13110.t03274	proline oxidase, mitochondrial precursor, putative, expressed	-	GO:0003824//catalytic activity	-	C1
LOC_Os10g40530|13110.t03289	LTPL146 - Protease inhibitor/seed storage/LTP family protein precursor, expressed	-	-	GO:0006810//transport	C1
LOC_Os10g40640|13110.t03303	glycosyl transferase 8 domain containing protein, putative, expressed	-	-	GO:0005975//carbohydrate metabolic process	C1
LOC_Os10g41330|13110.t03366	AP2 domain containing protein, expressed	-	GO:0003677//DNA binding	-	C1
LOC_Os10g41550|13110.t03386	beta-amylase, putative, expressed	-	GO:0016787//hydrolase activity	-	C1
LOC_Os10g41710|13110.t03398	chaperonin, putative, expressed	-	-	-	C1
LOC_Os10g42660|13110.t03487	expressed protein	-	-	-	C1
LOC_Os11g02240|13111.t00120	CAMK_KIN1/SNF1/Nim1_like.4 - CAMK includes calcium/calmodulin depedent protein kinases, expressed	-	GO:0000166//nucleotide binding	-	C1
LOC_Os11g02290|13111.t00125	expressed protein	-	-	-	C1
LOC_Os11g02330|13111.t00129	LTPL22 - Protease inhibitor/seed storage/LTP family protein precursor, expressed	GO:0005886//plasma membrane	-	-	C1
LOC_Os11g02379|13111.t00134	LTPL6 - Protease inhibitor/seed storage/LTP family protein precursor, expressed	-	-	-	C1
LOC_Os11g05160|13111.t00415	DNA binding protein, putative, expressed	-	GO:0003674//molecular_function	-	C1
LOC_Os11g05730|13111.t00474	histone H3, putative, expressed	-	GO:0003677//DNA binding	-	C1
LOC_Os11g06440|13111.t00546	expressed protein	-	-	-	C1
LOC_Os11g07960|13111.t00702	transferase family protein, putative, expressed	-	GO:0016740//transferase activity	-	C1
LOC_Os11g08210|13111.t00726	no apical meristem protein, putative, expressed	-	-	GO:0007275//multicellular organismal development	C1
LOC_Os11g10510|13111.t00951	dehydrogenase, putative, expressed	-	GO:0005488//binding	-	C1
LOC_Os11g10750|13111.t00973	OsSCP48 - Putative Serine Carboxypeptidase homologue, expressed	-	-	GO:0009987//cellular process	C1
LOC_Os11g11370|13111.t01034	expressed protein	-	-	-	C1
LOC_Os11g13570|13111.t01198	gibberellin receptor GID1L2, putative, expressed	-	-	-	C1
LOC_Os11g16550|13111.t01446	uncharacterized protein ycf53, putative, expressed	-	-	-	C1
LOC_Os11g16924|13111.t01482	expressed protein	-	-	-	C1
LOC_Os11g20790|13111.t01844	adenylate kinase, putative, expressed	GO:0005634//nucleus	-	-	C1
LOC_Os11g31900|13111.t02782	acyl carrier protein, putative, expressed	-	GO:0005215//transporter activity	-	C1
LOC_Os11g31980|13111.t02790	OsSCP63 - Putative Serine Carboxypeptidase homologue, expressed	-	-	GO:0009987//cellular process	C1
LOC_Os11g37100|13111.t03251	expressed protein	-	-	-	C1
LOC_Os11g40500|13111.t03584	OsSigP7 - Putative Type I Signal Peptidase homologue; employs a putative Ser/Lys catalytic dyad, expressed	-	-	GO:0009987//cellular process	C1
LOC_Os11g40590|13111.t03593	DUF1399 containing protein, putative, expressed	-	-	-	C1
LOC_Os12g01770|13112.t00075	protein phosphatase 2c, putative, expressed	-	GO:0005488//binding	-	C1
LOC_Os12g02200|13112.t00118	CAMK_KIN1/SNF1/Nim1_like.6 - CAMK includes calcium/calmodulin depedent protein kinases, expressed	-	GO:0000166//nucleotide binding	-	C1
LOC_Os12g02240|13112.t00122	hypothetical protein	-	-	-	C1
LOC_Os12g02290|13112.t00127	LTPL23 - Protease inhibitor/seed storage/LTP family protein precursor, expressed	GO:0005886//plasma membrane	-	-	C1
LOC_Os12g02570|13112.t00154	expressed protein	-	-	-	C1
LOC_Os12g03540|13112.t00247	WD domain, G-beta repeat domain containing protein, expressed	-	-	-	C1
LOC_Os12g04240|13112.t00315	peflin, putative, expressed	-	GO:0005488//binding	-	C1
LOC_Os12g04440|13112.t00334	2-isopropylmalate synthase B, putative, expressed	-	-	-	C1
LOC_Os12g05120|13112.t00402	receptor kinase, putative, expressed	-	GO:0000166//nucleotide binding	-	C1
LOC_Os12g06780|13112.t00563	expressed protein	-	-	-	C1
LOC_Os12g06870|13112.t00572	OsNucAP2 - Putative Nucleoporin Autopeptidase homologue, expressed	-	GO:0005215//transporter activity	-	C1
LOC_Os12g07820|13112.t00664	OsAPx6 - Stromal Ascorbate Peroxidase encoding gene 5,8, expressed	-	GO:0003824//catalytic activity	-	C1
LOC_Os12g08130|13112.t00697	amino acid transporter, putative, expressed	-	GO:0005215//transporter activity	-	C1
LOC_Os12g12880|13112.t01158	expressed protein	-	-	-	C1
LOC_Os12g13120|13112.t01181	histidine triad family protein, putative, expressed	-	-	-	C1
LOC_Os12g13570|13112.t01226	MYB family transcription factor, putative, expressed	-	GO:0003677//DNA binding	-	C1
LOC_Os12g19381|13112.t01779	ribulose bisphosphate carboxylase small chain, chloroplast precursor, putative, expressed	-	GO:0003824//catalytic activity	-	C1
LOC_Os12g24020|13112.t02131	rhodanese-like domain containing protein, putative, expressed	-	-	GO:0008150//biological_process	C1
LOC_Os12g25630|13112.t02284	sulfite oxidase, putative, expressed	-	GO:0003824//catalytic activity	-	C1
LOC_Os12g29760|13112.t02692	oxidoreductase, aldo/keto reductase family protein, putative, expressed	-	GO:0003824//catalytic activity	-	C1
LOC_Os12g34860|13112.t03186	phenylalanyl-tRNA synthetase, putative, expressed	-	GO:0000166//nucleotide binding	-	C1
LOC_Os12g36910|13112.t03386	calmodulin binding protein, putative, expressed	-	GO:0005515//protein binding	-	C1
LOC_Os12g39860|13112.t03675	phosphoribosyl transferase, putative, expressed	GO:0005618//cell wall	-	-	C1
LOC_Os12g40180|13112.t03707	expressed protein	-	-	-	C1
LOC_Os12g42400|13112.t03929	nuclear transcription factor Y subunit, putative, expressed	-	GO:0003700//sequence-specific DNA binding transcription factor activity	-	C1
LOC_Os01g03360|13101.t00229	BBTI5 - Bowman-Birk type bran trypsin inhibitor precursor, expressed	-	-	-	C2
LOC_Os01g03680|13101.t00258	BBTI8 - Bowman-Birk type bran trypsin inhibitor precursor, expressed	-	-	-	C2
LOC_Os01g04360|13101.t00323	hsp20/alpha crystallin family protein, putative, expressed	-	-	GO:0006950//response to stress	C2
LOC_Os01g04370|13101.t00324	hsp20/alpha crystallin family protein, putative, expressed	-	-	GO:0006950//response to stress	C2
LOC_Os01g04380|13101.t00325	hsp20/alpha crystallin family protein, putative, expressed	-	-	GO:0006950//response to stress	C2
LOC_Os01g04660|13101.t00351	lipid phosphatase protein, putative, expressed	-	GO:0016787//hydrolase activity	-	C2
LOC_Os01g06630|13101.t00543	small hydrophilic plant seed protein, putative, expressed	-	-	-	C2
LOC_Os01g10580|13101.t00929	B-box zinc finger family protein, putative, expressed	-	GO:0003700//sequence-specific DNA binding transcription factor activity	-	C2
LOC_Os01g12580|13101.t01120	late embryogenesis abundant protein, putative, expressed	-	-	GO:0000003//reproduction	C2
LOC_Os01g13060|13101.t01165	CK1_CaseinKinase_1.1 - CK1 includes the casein kinase 1 kinases, expressed	-	-	GO:0006464//protein modification process	C2
LOC_Os01g16920|13101.t01537	embryonic protein DC-8, putative, expressed	-	-	-	C2
LOC_Os01g18630|13101.t01648	aspartic proteinase oryzasin-1 precursor, putative, expressed	-	-	GO:0009987//cellular process	C2
LOC_Os01g24070|13101.t02108	GATA zinc finger domain containing protein, expressed	-	GO:0003700//sequence-specific DNA binding transcription factor activity	-	C2
LOC_Os01g29780|13101.t02587	expressed protein	-	-	-	C2
LOC_Os01g32380|13101.t02738	expressed protein	-	-	-	C2
LOC_Os01g37690|13101.t03231	sodium/calcium exchanger protein, putative, expressed	-	GO:0005215//transporter activity	-	C2
LOC_Os01g39020|13101.t03357	HSF-type DNA-binding domain containing protein, expressed	-	GO:0003677//DNA binding	-	C2
LOC_Os01g41720|13101.t03613	conserved hypothetical protein	-	-	-	C2
LOC_Os01g42520|13101.t03688	expressed protein	GO:0005618//cell wall	-	-	C2
LOC_Os01g43851|13101.t03819	cytochrome P450 72A1, putative, expressed	-	GO:0003824//catalytic activity	-	C2
LOC_Os01g45659|13101.t03940	hypothetical protein	-	-	-	C2
LOC_Os01g46580|13101.t04025	actin-related protein 2/3 complex subunit 2, putative, expressed	-	-	-	C2
LOC_Os01g47400|13101.t04109	OsMan01 - Endo-Beta-Mannanase, expressed	-	GO:0016787//hydrolase activity	-	C2
LOC_Os01g50616|13101.t04415	phosphatidylinositol transfer, putative, expressed	-	GO:0005215//transporter activity	-	C2
LOC_Os01g50700|13101.t04424	dehydrin family protein, expressed	GO:0005739//mitochondrion	-	-	C2
LOC_Os01g52830|13101.t04630	DUF1264 domain containing protein, putative, expressed	-	-	-	C2
LOC_Os01g54300|13101.t04768	OsMan02 - Endo-Beta-Mannanase	-	-	-	C2
LOC_Os01g55000|13101.t04835	expressed protein	-	-	-	C2
LOC_Os01g55160|13101.t04852	expressed protein	-	-	-	C2
LOC_Os01g56610|13101.t04993	homocysteine S-methyltransferase protein, putative, expressed	-	GO:0016740//transferase activity	-	C2
LOC_Os01g58670|13101.t05185	conserved hypothetical protein	-	-	-	C2
LOC_Os01g59020|13101.t05218	cytochrome P450, putative, expressed	GO:0005783//endoplasmic reticulum	-	-	C2
LOC_Os01g63010|13101.t05599	universal stress protein domain containing protein, putative, expressed	-	-	GO:0006950//response to stress	C2
LOC_Os01g63210|13101.t05618	SOUL heme-binding protein, putative, expressed	-	GO:0005488//binding	-	C2
LOC_Os01g64120|13101.t05703	2Fe-2S iron-sulfur cluster binding domain containing protein, expressed	-	GO:0003674//molecular_function	-	C2
LOC_Os01g64670|13101.t05759	soluble inorganic pyrophosphatase, putative, expressed	-	-	-	C2
LOC_Os01g68870|13101.t06163	leucine-rich repeat receptor protein kinase EXS precursor, putative, expressed	-	GO:0000166//nucleotide binding	-	C2
LOC_Os02g01150|13102.t00015	erythronate-4-phosphate dehydrogenase domain containing protein, expressed	-	GO:0003824//catalytic activity	-	C2
LOC_Os02g04160|13102.t00317	transcription elongation factor 1, putative, expressed	-	-	-	C2
LOC_Os02g04369|13102.t00339	expressed protein	-	-	-	C2
LOC_Os02g04780|13102.t00382	expressed protein	-	-	-	C2
LOC_Os02g06410|13102.t00546	CBS domain containing membrane protein, putative, expressed	-	-	-	C2
LOC_Os02g06560|13102.t00561	wound induced protein, putative, expressed	-	-	-	C2
LOC_Os02g07840|13102.t00692	bZIP transcription factor domain containing protein, expressed	-	GO:0003677//DNA binding	-	C2
LOC_Os02g09250|13102.t00786	cytochrome P450 71D10, putative, expressed	-	GO:0003824//catalytic activity	-	C2
LOC_Os02g15250|13102.t01332	late embryogenesis abundant domain-containing protein, putative, expressed	-	-	-	C2
LOC_Os02g15740|13102.t01381	expressed protein	-	-	-	C2
LOC_Os02g15930|13102.t01400	expressed protein	-	-	-	C2
LOC_Os02g25680|13102.t02277	expressed protein	-	-	-	C2
LOC_Os02g26470|13102.t02353	expressed protein	-	-	-	C2
LOC_Os02g30600|13102.t02768	conserved hypothetical protein	-	-	-	C2
LOC_Os02g32860|13102.t02945	poly synthetase 3, putative, expressed	-	GO:0003677//DNA binding	-	C2
LOC_Os02g33070|13102.t02966	expressed protein	-	-	-	C2
LOC_Os02g39000|13102.t03559	remorin C-terminal domain containing protein, putative, expressed	-	GO:0003677//DNA binding	-	C2
LOC_Os02g46610|13102.t04281	zinc-binding protein, putative, expressed	-	GO:0005488//binding	-	C2
LOC_Os02g48570|13102.t04482	peptide transporter PTR2, putative, expressed	-	GO:0005215//transporter activity	-	C2
LOC_Os02g49520|13102.t04578	armadillo/beta-catenin repeat family protein, putative, expressed	-	-	-	C2
LOC_Os02g52560|13102.t04884	xyloglucan fucosyltransferase, putative, expressed	-	GO:0016740//transferase activity	-	C2
LOC_Os02g54140|13102.t05041	hsp20/alpha crystallin family protein, putative, expressed	-	-	GO:0006950//response to stress	C2
LOC_Os02g55080|13102.t05133	snf1-related kinase interactor 2, putative, expressed	-	-	-	C2
LOC_Os03g02050|13103.t00106	LTPL151 - Protease inhibitor/seed storage/LTP family protein precursor, expressed	-	-	GO:0006810//transport	C2
LOC_Os03g03810|13103.t00270	DEF8 - Defensin and Defensin-like DEFL family, expressed	-	-	-	C2
LOC_Os03g04190|13103.t00304	cytochrome P450, putative	-	GO:0003824//catalytic activity	-	C2
LOC_Os03g04660|13103.t00349	cytochrome P450 86A1, putative, expressed	GO:0005783//endoplasmic reticulum	-	-	C2
LOC_Os03g04680|13103.t00351	cytochrome P450, putative, expressed	GO:0005783//endoplasmic reticulum	-	-	C2
LOC_Os03g04770|13103.t00359	beta-amylase, putative, expressed	-	GO:0016787//hydrolase activity	-	C2
LOC_Os03g06180|13103.t00497	expressed protein	-	-	-	C2
LOC_Os03g07100|13103.t00588	LTPL82 - Protease inhibitor/seed storage/LTP family protein precursor, expressed	GO:0005886//plasma membrane	-	-	C2
LOC_Os03g07180|13103.t00596	embryonic protein DC-8, putative, expressed	-	-	-	C2
LOC_Os03g11490|13103.t00967	expressed protein	-	-	-	C2
LOC_Os03g11910|13103.t01006	DnaK family protein, putative, expressed	GO:0005739//mitochondrion	-	-	C2
LOC_Os03g12730|13103.t01086	receptor protein kinase CLAVATA1 precursor, putative, expressed	-	GO:0000166//nucleotide binding	-	C2
LOC_Os03g12990|13103.t01112	phytosulfokines precursor, putative, expressed	-	-	-	C2
LOC_Os03g14180|13103.t01228	hsp20/alpha crystallin family protein, putative, expressed	-	-	GO:0006950//response to stress	C2
LOC_Os03g15530|13103.t01358	expressed protein	-	-	-	C2
LOC_Os03g16920|13103.t01490	DnaK family protein, putative, expressed	GO:0005739//mitochondrion	-	-	C2
LOC_Os03g16940|13103.t01492	glyoxalase family protein, putative, expressed	-	GO:0003824//catalytic activity	-	C2
LOC_Os03g17790|13103.t01571	OsRCI2-5 - Putative low temperature and salt responsive protein, expressed	-	-	GO:0006950//response to stress	C2
LOC_Os03g18960|13103.t01685	calmodulin binding protein, putative, expressed	-	GO:0005515//protein binding	-	C2
LOC_Os03g20120|13103.t01799	glycosyl transferase 8 domain containing protein, putative, expressed	-	-	GO:0009058//biosynthetic process	C2
LOC_Os03g20680|13103.t01851	late embryogenesis abundant protein 1, putative, expressed	-	-	GO:0000003//reproduction	C2
LOC_Os03g21260|13103.t01907	2,3-bisphosphoglycerate-independent phosphoglycerate mutase, putative	-	GO:0003824//catalytic activity	-	C2
LOC_Os03g21650|13103.t01944	expressed protein	-	-	-	C2
LOC_Os03g26490|13103.t02360	expressed protein	-	-	-	C2
LOC_Os03g26870|13103.t02394	WD-40 repeat family protein, putative, expressed	GO:0005886//plasma membrane	-	-	C2
LOC_Os03g27280|13103.t02430	CAMK_CAMK_like.19 - CAMK includes calcium/calmodulin depedent protein kinases, expressed	-	GO:0000166//nucleotide binding	-	C2
LOC_Os03g27800|13103.t02480	paramyosin, putative, expressed	-	-	-	C2
LOC_Os03g28160|13103.t02515	jacalin-like lectin domain containing protein, expressed	-	-	-	C2
LOC_Os03g28990|13103.t02546	zinc finger family protein, putative, expressed	-	GO:0003824//catalytic activity	-	C2
LOC_Os03g30530|13103.t02686	expressed protein	-	-	-	C2
LOC_Os03g31750|13103.t02797	pyruvate, phosphate dikinase, chloroplast precursor, putative, expressed	GO:0005829//cytosol	-	-	C2
LOC_Os03g42430|13103.t03653	B3 DNA binding domain containing protein, expressed	-	GO:0003677//DNA binding	-	C2
LOC_Os03g42520|13103.t03661	expressed protein	-	-	-	C2
LOC_Os03g46100|13103.t03985	cupin domain containing protein, expressed	-	GO:0003674//molecular_function	-	C2
LOC_Os03g51010|13103.t04442	hydrolase, alpha/beta fold family domain containing protein, expressed	-	GO:0003824//catalytic activity	-	C2
LOC_Os03g51350|13103.t04474	expressed protein	-	-	-	C2
LOC_Os03g52380|13103.t04570	PIII5 - Proteinase inhibitor II family protein precursor, expressed	-	-	-	C2
LOC_Os03g52860|13103.t04612	lipoxygenase, putative, expressed	-	GO:0003824//catalytic activity	-	C2
LOC_Os03g53610|13103.t04685	late embryogenesis abundant protein D-34, putative	-	-	GO:0000003//reproduction	C2
LOC_Os03g53620|13103.t04686	late embryogenesis abundant protein D-34, putative, expressed	-	-	-	C2
LOC_Os03g53900|13103.t04711	universal stress protein domain containing protein, putative, expressed	-	-	GO:0006950//response to stress	C2
LOC_Os03g54050|13103.t04726	anther-specific proline-rich protein APG precursor, putative, expressed	-	-	-	C2
LOC_Os03g57690|13103.t05040	aldehyde oxidase, putative	-	GO:0003824//catalytic activity	-	C2
LOC_Os03g57960|13103.t05064	cupin domain containing protein, expressed	-	GO:0003674//molecular_function	-	C2
LOC_Os03g58580|13103.t05120	nodulin, putative, expressed	-	-	-	C2
LOC_Os03g59460|13103.t05201	transcription factor, putative	-	GO:0003700//sequence-specific DNA binding transcription factor activity	-	C2
LOC_Os03g62590|13103.t05499	oxidoreductase, short chain dehydrogenase/reductase family domain containing protein, expressed	-	GO:0003824//catalytic activity	-	C2
LOC_Os03g63280|13103.t05558	regulatory protein, putative, expressed	GO:0009536//plastid	-	-	C2
LOC_Os04g01690|13104.t00066	pyridoxal-dependent decarboxylase protein, putative, expressed	-	-	GO:0006950//response to stress	C2
LOC_Os04g02754|13104.t00165	amidase family protein, putative, expressed	-	-	-	C2
LOC_Os04g09390|13104.t00770	HEV3 - Hevein family protein precursor, expressed	-	-	-	C2
LOC_Os04g14150|13104.t01221	dehydration response related protein, putative, expressed	GO:0005618//cell wall	-	-	C2
LOC_Os04g18950|13104.t01624	expressed protein	-	-	-	C2
LOC_Os04g20774|13104.t01797	pumilio-family RNA binding repeat containing protein, expressed	-	-	-	C2
LOC_Os04g28250|13104.t02503	cysteine proteinase inhibitor precursor, putative, expressed	-	-	-	C2
LOC_Os04g28820|13104.t02557	retrotransposon protein, putative, unclassified, expressed	-	-	-	C2
LOC_Os04g32080|13104.t02866	11-beta-hydroxysteroid dehydrogenase, putative, expressed	-	GO:0003824//catalytic activity	-	C2
LOC_Os04g33990|13104.t03054	harpin-induced protein 1 domain containing protein, expressed	GO:0005618//cell wall	-	-	C2
LOC_Os04g35490|13104.t03201	expressed protein	-	-	-	C2
LOC_Os04g39150|13104.t03468	pathogenesis-related Bet v I family protein, putative, expressed	-	-	-	C2
LOC_Os04g41970|13104.t03736	endoglucanase, putative, expressed	-	GO:0016787//hydrolase activity	-	C2
LOC_Os04g43170|13104.t03848	caleosin related protein, putative, expressed	-	GO:0005488//binding	-	C2
LOC_Os04g43360|13104.t03865	Os4bglu14 - monolignol beta-glucoside homologue without catalytic acid/base, expressed	GO:0005618//cell wall	-	-	C2
LOC_Os04g44210|13104.t03947	expressed protein	-	-	-	C2
LOC_Os04g46390|13104.t04156	chaperone protein dnaJ, putative, expressed	GO:0005739//mitochondrion	-	-	C2
LOC_Os04g47590|13104.t04273	niemann-Pick C1 protein precursor, putative, expressed	-	GO:0004872//receptor activity	-	C2
LOC_Os04g49980|13104.t04507	late embryogenesis abundant group 1, putative, expressed	-	-	-	C2
LOC_Os04g52110|13104.t04689	late embryogenesis abundant protein, group 3, putative, expressed	-	-	-	C2
LOC_Os04g52750|13104.t04752	expressed protein	-	-	-	C2
LOC_Os04g54620|13104.t04942	expressed protein	-	-	-	C2
LOC_Os04g55730|13104.t05050	alpha-N-acetylglucosaminidase, putative, expressed	-	GO:0016787//hydrolase activity	-	C2
LOC_Os04g59520|13104.t05422	anthranilate phosphoribosyltransferase, putative, expressed	GO:0005783//endoplasmic reticulum	-	-	C2
LOC_Os05g04700|13105.t00366	OsRCI2-6 - Hydrophobic protein LTI6B, expressed	-	-	-	C2
LOC_Os05g04870|13105.t00383	oxidoreductase, short chain dehydrogenase/reductase family protein, putative, expressed	-	GO:0003824//catalytic activity	-	C2
LOC_Os05g05930|13105.t00487	peripheral-type benzodiazepine receptor, putative, expressed	-	-	-	C2
LOC_Os05g07560|13105.t00643	expressed protein	-	-	-	C2
LOC_Os05g08044|13105.t00691	expressed protein	-	-	-	C2
LOC_Os05g11510|13105.t00995	B-box zinc finger family protein, putative, expressed	-	GO:0003700//sequence-specific DNA binding transcription factor activity	-	C2
LOC_Os05g15770|13105.t01370	glycosyl hydrolase, putative, expressed	-	GO:0016787//hydrolase activity	-	C2
LOC_Os05g20450|13105.t01829	retrotransposon protein, putative, unclassified	-	-	-	C2
LOC_Os05g20460|13105.t01830	retrotransposon protein, putative, unclassified	-	-	-	C2
LOC_Os05g25640|13105.t02246	cytochrome P450, putative, expressed	-	GO:0003824//catalytic activity	-	C2
LOC_Os05g28210|13105.t02498	small hydrophilic plant seed protein, putative, expressed	-	-	-	C2
LOC_Os05g30490|13105.t02672	harpin-induced protein 1 domain containing protein	-	-	-	C2
LOC_Os05g31020|13105.t02726	eukaryotic peptide chain release factor subunit 1-1, putative, expressed	-	-	GO:0006412//translation	C2
LOC_Os05g31670|13105.t02788	AWPM-19-like membrane family protein, putative, expressed	GO:0016020//membrane	-	-	C2
LOC_Os05g33140|13105.t02936	CHIT5 - Chitinase family protein precursor, expressed	-	-	GO:0006950//response to stress	C2
LOC_Os05g35200|13105.t03142	glycosyl transferase, putative, expressed	-	-	GO:0005975//carbohydrate metabolic process	C2
LOC_Os05g35360|13105.t03158	beta-galactosidase 7 precursor, putative, expressed	-	GO:0016787//hydrolase activity	-	C2
LOC_Os05g39250|13105.t03499	phosphatidylethanolamine-binding protein, putative, expressed	-	GO:0008289//lipid binding	-	C2
LOC_Os05g39690|13105.t03543	oxidoreductase, aldo/keto reductase family protein, putative, expressed	-	-	-	C2
LOC_Os05g40010|13105.t03574	LTPL17 - Protease inhibitor/seed storage/LTP family protein precursor, expressed	GO:0005886//plasma membrane	-	-	C2
LOC_Os05g43460|13105.t03872	DUF567 domain containing protein, putative, expressed	-	-	-	C2
LOC_Os05g44340|13105.t03960	heat shock protein 101, putative, expressed	-	GO:0000166//nucleotide binding	-	C2
LOC_Os05g44810|13105.t04008	OsIAA18 - Auxin-responsive Aux/IAA gene family member, expressed	-	GO:0003700//sequence-specific DNA binding transcription factor activity	-	C2
LOC_Os05g45730|13105.t04101	ubiquinone oxidoreductase, putative, expressed	-	GO:0003824//catalytic activity	-	C2
LOC_Os05g46480|13105.t04177	late embryogenesis abundant protein, group 3, putative, expressed	-	-	GO:0000003//reproduction	C2
LOC_Os05g47870|13105.t04267	expressed protein	-	-	-	C2
LOC_Os05g49300|13105.t04410	iron-sulfur cluster assembly enzyme ISCU, mitochondrial precursor, putative, expressed	-	-	GO:0008152//metabolic process	C2
LOC_Os06g02000|13106.t00092	adenylate kinase, putative, expressed	GO:0005634//nucleus	-	-	C2
LOC_Os06g02490|13106.t00138	acyl CoA binding protein, putative, expressed	-	-	-	C2
LOC_Os06g04460|13106.t00331	hypersensitive-induced response protein, putative, expressed	-	-	-	C2
LOC_Os06g04940|13106.t00378	early nodulin 93 ENOD93 protein, putative, expressed	GO:0005739//mitochondrion	-	-	C2
LOC_Os06g08250|13106.t00706	zinc finger family protein, putative, expressed	-	GO:0005488//binding	-	C2
LOC_Os06g18670|13106.t01689	anthocyanidin 3-O-glucosyltransferase, putative, expressed	-	-	GO:0006519//cellular amino acid and derivative metabolic process	C2
LOC_Os06g21910|13106.t02007	late embryogenesis abundant group 1, putative, expressed	-	-	-	C2
LOC_Os06g23274|13106.t02139	zinc finger, C3HC4 type, domain containing protein, expressed	-	GO:0003824//catalytic activity	-	C2
LOC_Os06g23350|13106.t02146	late embryogenesis abundant protein D-34, putative, expressed	-	-	GO:0000003//reproduction	C2
LOC_Os06g24430|13106.t02249	hypothetical protein	-	-	-	C2
LOC_Os06g26180|13106.t02417	hypothetical protein	-	-	-	C2
LOC_Os06g27760|13106.t02471	peptide methionine sulfoxide reductase msrB, putative, expressed	-	-	GO:0006950//response to stress	C2
LOC_Os06g30130|13106.t02699	cysteine-rich receptor-like protein kinase 10 precursor, putative, expressed	-	GO:0000166//nucleotide binding	-	C2
LOC_Os06g30179|13106.t02703	cytochrome P450, putative, expressed	GO:0005739//mitochondrion	-	-	C2
LOC_Os06g31890|13106.t02869	THION3 - Plant thionin family protein precursor, expressed	-	GO:0003674//molecular_function	-	C2
LOC_Os06g32240|13106.t02904	THION9 - Plant thionin family protein precursor, expressed	-	GO:0003674//molecular_function	-	C2
LOC_Os06g33330|13106.t03011	powdery mildew resistant protein 5, putative, expressed	-	-	GO:0006950//response to stress	C2
LOC_Os06g42754|13106.t03947	expressed protein	-	-	-	C2
LOC_Os06g43960|13106.t04062	expressed protein	-	-	-	C2
LOC_Os06g44190|13106.t04087	hypothetical protein	-	-	-	C2
LOC_Os06g48060|13106.t04473	ABC transporter, ATP-binding protein, putative, expressed	-	GO:0005215//transporter activity	-	C2
LOC_Os06g48500|13106.t04517	expressed protein	-	-	-	C2
LOC_Os06g49190|13106.t04587	LTPL154 - Protease inhibitor/seed storage/LTP family protein precursor, expressed	-	-	GO:0006810//transport	C2
LOC_Os06g49250|13106.t04593	peptide transporter PTR2, putative, expressed	-	GO:0005215//transporter activity	-	C2
LOC_Os07g05370|13107.t00430	TKL_IRAK_CrRLK1L-1.15 - The CrRLK1L-1 subfamily has homology to the CrRLK1L homolog, expressed	-	GO:0000166//nucleotide binding	-	C2
LOC_Os07g09970|13107.t00873	LTPL84 - Protease inhibitor/seed storage/LTP family protein precursor, expressed	GO:0005886//plasma membrane	-	-	C2
LOC_Os07g10570|13107.t00935	PROLM25 - Prolamin precursor, expressed	-	-	-	C2
LOC_Os07g16970|13107.t01560	rab GDP dissociation inhibitor alpha, putative, expressed	-	-	GO:0006810//transport	C2
LOC_Os07g20340|13107.t01843	heavy metal-associated domain containing protein, expressed	-	GO:0005488//binding	-	C2
LOC_Os07g22224|13107.t01927	expressed protein	-	-	-	C2
LOC_Os07g24000|13107.t02091	AWPM-19-like membrane family protein, putative, expressed	GO:0016020//membrane	-	-	C2
LOC_Os07g28480|13107.t02532	glutathione S-transferase, putative, expressed	-	GO:0016740//transferase activity	-	C2
LOC_Os07g38130|13107.t03465	polygalacturonase inhibitor 1 precursor, putative, expressed	-	GO:0000166//nucleotide binding	-	C2
LOC_Os07g38290|13107.t03480	plastocyanin-like domain containing protein, putative, expressed	-	GO:0005488//binding	-	C2
LOC_Os07g39920|13107.t03642	formin, putative, expressed	-	GO:0005515//protein binding	-	C2
LOC_Os07g42910|13107.t03929	cytochrome c oxidase subunit, putative, expressed	-	GO:0003824//catalytic activity	-	C2
LOC_Os07g44430|13107.t04073	peroxiredoxin, putative	-	GO:0003674//molecular_function	-	C2
LOC_Os07g46360|13107.t04263	glyoxalase family protein, putative, expressed	-	GO:0003824//catalytic activity	-	C2
LOC_Os07g46990|13107.t04329	copper/zinc superoxide dismutase, putative, expressed	-	GO:0003824//catalytic activity	-	C2
LOC_Os07g47840|13107.t04414	expressed protein	-	-	-	C2
LOC_Os07g49360|13107.t04564	peroxidase precursor, putative, expressed	-	GO:0003674//molecular_function	-	C2
LOC_Os08g01370|13108.t00038	expressed protein	-	-	-	C2
LOC_Os08g03410|13108.t00243	glutelin, putative, expressed	-	GO:0003674//molecular_function	-	C2
LOC_Os08g03690|13108.t00272	LTPL24 - Protease inhibitor/seed storage/LTP family protein precursor, expressed	GO:0005886//plasma membrane	-	-	C2
LOC_Os08g06100|13108.t00505	O-methyltransferase, putative, expressed	GO:0005634//nucleus	-	-	C2
LOC_Os08g18974|13108.t01721	expressed protein	-	-	-	C2
LOC_Os08g23170|13108.t02092	expressed protein	-	-	-	C2
LOC_Os08g23870|13108.t02162	late embryogenesis abundant group 1, putative, expressed	-	-	GO:0000003//reproduction	C2
LOC_Os08g34280|13108.t03178	cinnamoyl-CoA reductase, putative, expressed	-	GO:0003824//catalytic activity	-	C2
LOC_Os08g36320|13108.t03382	decarboxylase, putative, expressed	-	GO:0003824//catalytic activity	-	C2
LOC_Os08g40720|13108.t03814	FAD-binding and arabino-lactone oxidase domains containing protein, putative, expressed	-	GO:0003824//catalytic activity	-	C2
LOC_Os08g42720|13108.t04012	solute carrier family 35 member F1, putative, expressed	GO:0016020//membrane	-	-	C2
LOC_Os08g42910|13108.t04031	peptidase, M24 family protein, putative, expressed	-	-	GO:0009987//cellular process	C2
LOC_Os08g45110|13108.t04243	AP2 domain containing protein, expressed	-	GO:0003677//DNA binding	-	C2
LOC_Os09g04100|13109.t00309	expressed protein	-	-	-	C2
LOC_Os09g08280|13109.t00624	expressed protein	-	-	-	C2
LOC_Os09g19890|13109.t01727	expressed protein	-	-	-	C2
LOC_Os09g20400|13109.t01780	expressed protein	-	-	-	C2
LOC_Os09g20440|13109.t01784	succinate dehydrogenase and fumarate reductase iron-sulfur protein	GO:0005739//mitochondrion	-	-	C2
LOC_Os09g21919|13109.t01932	expressed protein	-	-	-	C2
LOC_Os09g26380|13109.t02323	aminotransferase, classes I and II, domain containing protein, expressed	-	GO:0003824//catalytic activity	-	C2
LOC_Os09g30240|13109.t02702	phosphofructokinase, putative, expressed	GO:0005829//cytosol	-	-	C2
LOC_Os09g32010|13109.t02817	ternary complex factor MIP1, putative, expressed	-	GO:0003700//sequence-specific DNA binding transcription factor activity	-	C2
LOC_Os09g33550|13109.t02934	CCT/B-box zinc finger protein, putative, expressed	-	GO:0003700//sequence-specific DNA binding transcription factor activity	-	C2
LOC_Os09g33680|13109.t02948	Os9bglu31 - beta-glucosidase, dhurrinase, similar to G. max hydroxyisourate hydrolase, expressed	GO:0005618//cell wall	-	-	C2
LOC_Os09g33876|13109.t02968	expressed protein	-	GO:0000166//nucleotide binding	-	C2
LOC_Os09g36700|13109.t03155	ribonuclease T2 family domain containing protein, expressed	-	GO:0004518//nuclease activity	-	C2
LOC_Os09g39730|13109.t03457	Core histone H2A/H2B/H3/H4 domain containing protein, putative, expressed	-	GO:0003677//DNA binding	-	C2
LOC_Os10g29570|13110.t02295	late embryogenesis abundant protein D-34, putative, expressed	-	-	-	C2
LOC_Os10g30560|13110.t02388	UDP-glucoronosyl and UDP-glucosyl transferase domain containing protein, expressed	-	GO:0016740//transferase activity	-	C2
LOC_Os10g36170|13110.t02899	LTPL160 - Protease inhibitor/seed storage/LTP family protein precursor, expressed	-	-	GO:0006810//transport	C2
LOC_Os10g36180|13110.t02900	expressed protein	-	-	-	C2
LOC_Os10g38090|13110.t03063	cytochrome P450, putative, expressed	-	GO:0003824//catalytic activity	-	C2
LOC_Os10g38489|13110.t03091	glutathione S-transferase GSTU6, putative, expressed	-	GO:0016740//transferase activity	-	C2
LOC_Os10g39610|13110.t03200	expressed protein	-	GO:0005488//binding	-	C2
LOC_Os11g02389|13111.t00135	protease inhibitor/seed storage/LTP family, putative, expressed	GO:0005886//plasma membrane	-	-	C2
LOC_Os11g02400|13111.t00136	LTPL8 - Protease inhibitor/seed storage/LTP family protein precursor, expressed	GO:0005886//plasma membrane	-	-	C2
LOC_Os11g02424|13111.t00138	LTPL9 - Protease inhibitor/seed storage/LTP family protein precursor, expressed	GO:0005886//plasma membrane	-	-	C2
LOC_Os11g03700|13111.t00263	histone-lysine N-methyltransferase, H3 lysine-9 specific SUVH1, putative	-	GO:0003676//nucleic acid binding	-	C2
LOC_Os11g05410|13111.t00441	Ser/Thr protein phosphatase family protein, putative, expressed	GO:0005618//cell wall	-	-	C2
LOC_Os11g07600|13111.t00663	ABC-2 type transporter domain containing protein, expressed	-	GO:0005215//transporter activity	-	C2
LOC_Os11g07911|13111.t00695	expressed protein	-	-	-	C2
LOC_Os11g10590|13111.t00959	hypothetical protein	-	-	-	C2
LOC_Os11g12710|13111.t01165	retrotransposon protein, putative, unclassified	-	-	-	C2
LOC_Os11g18570|13111.t01629	cytochrome P450, putative, expressed	-	GO:0003824//catalytic activity	-	C2
LOC_Os11g24070|13111.t02028	LTPL10 - Protease inhibitor/seed storage/LTP family protein precursor, expressed	GO:0005886//plasma membrane	-	-	C2
LOC_Os11g26570|13111.t02267	dehydrin, putative, expressed	-	-	-	C2
LOC_Os11g26750|13111.t02284	dehydrin, putative, expressed	-	-	-	C2
LOC_Os11g26760|13111.t02285	dehydrin, putative, expressed	-	-	-	C2
LOC_Os11g26790|13111.t02288	dehydrin, putative, expressed	-	-	-	C2
LOC_Os11g32650|13111.t02857	chalcone synthase, putative, expressed	-	-	GO:0006519//cellular amino acid and derivative metabolic process	C2
LOC_Os11g32890|13111.t02881	expressed protein	-	-	-	C2
LOC_Os11g37270|13111.t03267	AMBP1 - Antimicrobial peptide MBP-1 family protein precursor, expressed	-	-	-	C2
LOC_Os12g02320|13112.t00130	LTPL12 - Protease inhibitor/seed storage/LTP family protein precursor, expressed	GO:0005886//plasma membrane	-	-	C2
LOC_Os12g02340|13112.t00132	LTPL14 - Protease inhibitor/seed storage/LTP family protein precursor, expressed	GO:0005886//plasma membrane	-	-	C2
LOC_Os12g03530|13112.t00246	alpha-N-arabinofuranosidase, putative, expressed	-	GO:0016787//hydrolase activity	-	C2
LOC_Os12g05210|13112.t00412	expressed protein	-	-	-	C2
LOC_Os12g07280|13112.t00611	ZOS12-02 - C2H2 zinc finger protein, expressed	-	GO:0003676//nucleic acid binding	-	C2
LOC_Os12g13445|13112.t04165	expressed protein	-	-	-	C2
LOC_Os12g27830|13112.t02499	dehydrogenase/reductase, putative, expressed	-	GO:0003824//catalytic activity	-	C2
LOC_Os12g31850|13112.t02892	ureide permease, putative, expressed	-	-	-	C2
LOC_Os12g37320|13112.t03427	lipoxygenase 2.2, chloroplast precursor, putative, expressed	-	GO:0003824//catalytic activity	-	C2
LOC_Os12g43140|13112.t04001	late embryogenesis abundant protein D-34, putative, expressed	-	-	-	C2
LOC_Os12g43340|13112.t04018	actin-depolymerizing factor, putative, expressed	GO:0005622//intracellular	-	-	C2
LOC_Os12g44190|13112.t04101	ATPase 3, putative, expressed	-	GO:0000166//nucleotide binding	-	C2
LOC_Os12g44270|13112.t04109	glycine-rich protein, putative	-	-	-	C2
LOC_Os07g28850|13107.t02570	retrotransposon protein, putative, unclassified, expressed	-	-	-	C2
LOC_Os01g02160|13101.t00113	hydroxyproline-rich glycoprotein family protein, putative, expressed	-	-	-	C3
LOC_Os01g15830|13101.t01429	peroxidase precursor, putative, expressed	-	GO:0003824//catalytic activity	-	C3
LOC_Os01g19820|13101.t01761	universal stress protein domain containing protein, putative, expressed	-	-	GO:0006950//response to stress	C3
LOC_Os01g21590|13101.t01883	homeodomain, putative, expressed	-	GO:0003700//sequence-specific DNA binding transcription factor activity	-	C3
LOC_Os01g43140|13101.t03749	lipase, putative, expressed	-	-	GO:0006629//lipid metabolic process	C3
LOC_Os01g45624|13101.t03936	oleosin, putative, expressed	-	-	GO:0006629//lipid metabolic process	C3
LOC_Os01g55690|13101.t04902	glutelin, putative, expressed	-	GO:0003674//molecular_function	-	C3
LOC_Os01g56235|13101.t04955	expressed protein	-	-	-	C3
LOC_Os01g57690|13101.t05093	early nodulin 20 precursor, putative, expressed	-	GO:0005488//binding	-	C3
LOC_Os01g62290|13101.t05528	DnaK family protein, putative, expressed	GO:0005739//mitochondrion	-	-	C3
LOC_Os01g65670|13101.t05854	amino acid transporter, putative, expressed	-	GO:0005215//transporter activity	-	C3
LOC_Os01g73720|13101.t06587	RCLEA4 - Root cap and Late embryogenesis related family protein precursor, expressed	-	-	-	C3
LOC_Os02g05830|13102.t00487	ribulose bisphosphate carboxylase small chain, chloroplast precursor, putative, expressed	-	GO:0003824//catalytic activity	-	C3
LOC_Os02g06360|13102.t00541	uncharacterized protein CPn_0526/CP_0226/CPj0526/CpB0547, putative, expressed	-	-	-	C3
LOC_Os02g33380|13102.t02997	pectinesterase inhibitor domain containing protein, putative, expressed	-	-	-	C3
LOC_Os02g41630|13102.t03775	phenylalanine ammonia-lyase, putative, expressed	-	GO:0003824//catalytic activity	-	C3
LOC_Os02g47840|13102.t04405	universal stress protein domain containing protein, putative, expressed	-	-	GO:0006950//response to stress	C3
LOC_Os02g49720|13102.t04598	aldehyde dehydrogenase, putative, expressed	-	GO:0003824//catalytic activity	-	C3
LOC_Os02g52150|13102.t04844	heat shock 22 kDa protein, mitochondrial precursor, putative, expressed	-	-	GO:0006950//response to stress	C3
LOC_Os02g56460|13102.t05271	dehydrogenase, putative, expressed	-	GO:0003824//catalytic activity	-	C3
LOC_Os02g56540|13102.t05279	kinesin motor domain containing protein, putative, expressed	-	GO:0003774//motor activity	-	C3
LOC_Os02g56680|13102.t05294	dehydrogenase, putative, expressed	-	GO:0003824//catalytic activity	-	C3
LOC_Os02g57110|13102.t05337	GDSL-like lipase/acylhydrolase, putative, expressed	-	-	GO:0000003//reproduction	C3
LOC_Os03g04220|13103.t00306	glutathione S-transferase, putative, expressed	GO:0005634//nucleus	-	-	C3
LOC_Os03g06705|13103.t05676	3-ketoacyl-CoA synthase, putative, expressed	-	-	-	C3
LOC_Os03g08220|13103.t00696	lipoxygenase protein, putative, expressed	-	GO:0003824//catalytic activity	-	C3
LOC_Os03g12510|13103.t01064	non-symbiotic hemoglobin 2, putative, expressed	-	-	-	C3
LOC_Os03g12900|13103.t01103	squalene monooxygenase, putative, expressed	-	-	GO:0006629//lipid metabolic process	C3
LOC_Os03g16260|13103.t01430	protein kinase, putative, expressed	-	GO:0000166//nucleotide binding	-	C3
LOC_Os03g16860|13103.t01483	DnaK family protein, putative, expressed	GO:0005739//mitochondrion	-	-	C3
LOC_Os03g17200|13103.t01518	plant-specific domain TIGR01589 family protein	-	-	GO:0008150//biological_process	C3
LOC_Os03g36560|13103.t03143	peroxidase precursor, putative, expressed	-	GO:0003824//catalytic activity	-	C3
LOC_Os03g42420|13103.t03652	B3 DNA binding domain containing protein, expressed	-	GO:0003677//DNA binding	-	C3
LOC_Os03g45250|13103.t03908	2-aminoethanethiol dioxygenase, putative, expressed	-	-	-	C3
LOC_Os03g58650|13103.t05127	expressed protein	-	-	-	C3
LOC_Os04g01740|13104.t00070	heat shock protein, putative, expressed	-	GO:0000166//nucleotide binding	-	C3
LOC_Os04g05050|13104.t00383	pectate lyase precursor, putative, expressed	-	GO:0003824//catalytic activity	-	C3
LOC_Os04g17660|13104.t01503	rhodanese-like domain containing protein, putative, expressed	-	-	GO:0008150//biological_process	C3
LOC_Os04g28420|13104.t02519	rhodanese-like domain containing protein, putative, expressed	-	-	GO:0008150//biological_process	C3
LOC_Os04g35270|13104.t03179	alpha-1,4-fucosyltransferase, putative, expressed	-	GO:0016740//transferase activity	-	C3
LOC_Os04g38790|13104.t03431	expressed protein	-	-	-	C3
LOC_Os04g38940|13104.t03447	integral membrane protein, putative, expressed	-	-	-	C3
LOC_Os04g39864|13104.t03531	Os4bglu11 - beta-glucosidase homologue, similar to Os4Bglu12 exoglucanase/beta-glucosidase, expressed	GO:0005618//cell wall	-	-	C3
LOC_Os04g40510|13104.t03595	glycosyl hydrolase family 5 protein, putative, expressed	-	GO:0016787//hydrolase activity	-	C3
LOC_Os04g40540|13104.t03598	protein-L-isoaspartate O-methyltransferase, putative, expressed	-	-	GO:0006464//protein modification process	C3
LOC_Os04g47250|13104.t04241	cytochrome P450, putative, expressed	-	GO:0003824//catalytic activity	-	C3
LOC_Os04g50960|13104.t04571	expressed protein	-	-	-	C3
LOC_Os04g59150|13104.t05387	peroxidase precursor, putative, expressed	-	GO:0003824//catalytic activity	-	C3
LOC_Os04g59260|13104.t05398	peroxidase precursor, putative, expressed	-	GO:0003824//catalytic activity	-	C3
LOC_Os05g02070|13105.t00107	expressed protein	-	-	-	C3
LOC_Os05g04820|13105.t00378	MYB family transcription factor, putative, expressed	-	GO:0003677//DNA binding	-	C3
LOC_Os05g07890|13105.t00675	embryo-specific 3, putative, expressed	GO:0016020//membrane	-	-	C3
LOC_Os05g33380|13105.t02959	fructose-bisphospate aldolase isozyme, putative, expressed	-	GO:0003824//catalytic activity	-	C3
LOC_Os05g34170|13105.t03039	tubulin/FtsZ domain containing protein, putative, expressed	-	GO:0005198//structural molecule activity	-	C3
LOC_Os05g39310|13105.t03505	thiamine pyrophosphate enzyme, C-terminal TPP binding domain containing protein	-	GO:0003824//catalytic activity	-	C3
LOC_Os05g39320|13105.t03506	thiamine pyrophosphate enzyme, C-terminal TPP binding domain containing protein, expressed	-	GO:0003824//catalytic activity	-	C3
LOC_Os05g49730|13105.t04454	protein phosphatase 2C, putative, expressed	-	GO:0005488//binding	-	C3
LOC_Os06g03520|13106.t00241	DUF581 domain containing protein, expressed	-	-	-	C3
LOC_Os06g04990|13106.t00383	early nodulin 93 ENOD93 protein, putative, expressed	GO:0005739//mitochondrion	-	-	C3
LOC_Os06g05000|13106.t00384	early nodulin 93 ENOD93 protein, putative, expressed	GO:0005739//mitochondrion	-	-	C3
LOC_Os06g05010|13106.t00385	early nodulin 93 ENOD93 protein, putative, expressed	GO:0005739//mitochondrion	-	-	C3
LOC_Os06g05020|13106.t00386	early nodulin 93 ENOD93 protein, putative, expressed	GO:0005739//mitochondrion	-	-	C3
LOC_Os06g05480|13106.t00433	expressed protein	-	-	-	C3
LOC_Os06g06980|13106.t00582	caffeoyl-CoA O-methyltransferase, putative, expressed	GO:0005829//cytosol	-	-	C3
LOC_Os06g09600|13106.t00839	expressed protein	-	-	-	C3
LOC_Os06g11090|13106.t00983	CXE carboxylesterase, putative, expressed	-	-	-	C3
LOC_Os06g14620|13106.t01336	ribonucleoside-diphosphate reductase small chain, putative, expressed	-	-	-	C3
LOC_Os06g18010|13106.t01672	UDP-glucoronosyl and UDP-glucosyl transferase domain containing protein, expressed	-	-	GO:0006519//cellular amino acid and derivative metabolic process	C3
LOC_Os06g30370|13106.t02720	osMFT1 MFT-Like1 homologous to Mother of FT and TFL1 gene; contains Pfam profile PF01161: Phosphatidylethanolamine-binding protein, expressed	-	GO:0008289//lipid binding	-	C3
LOC_Os06g32350|13106.t02915	THION12 - Plant thionin family protein precursor	-	GO:0003674//molecular_function	-	C3
LOC_Os06g32355|13106.t04874	conserved hypothetical protein	-	-	-	C3
LOC_Os06g32370|13106.t02917	THION16 - Plant thionin family protein precursor, putative	-	-	-	C3
LOC_Os06g49100|13106.t04577	retrotransposon protein, putative, unclassified, expressed	-	-	-	C3
LOC_Os07g05020|13107.t00393	expressed protein	-	-	-	C3
LOC_Os07g06840|13107.t00572	gibberellin receptor GID1L2, putative, expressed	-	-	-	C3
LOC_Os07g09630|13107.t00839	oxidoreductase, putative, expressed	-	GO:0003824//catalytic activity	-	C3
LOC_Os07g10580|13107.t00936	PROLM26 - Prolamin precursor, expressed	-	-	-	C3
LOC_Os07g36590|13107.t03314	serine/threonine-protein kinase receptor precursor, putative, expressed	-	GO:0000166//nucleotide binding	-	C3
LOC_Os07g36610|13107.t03316	CSLF9 - cellulose synthase-like family F; beta1,3;1,4 glucan synthase, expressed	GO:0005783//endoplasmic reticulum	-	-	C3
LOC_Os07g47620|13107.t04392	universal stress protein domain containing protein, putative, expressed	-	-	GO:0006950//response to stress	C3
LOC_Os07g47790|13107.t04409	AP2 domain containing protein, expressed	-	GO:0003677//DNA binding	-	C3
LOC_Os07g48460|13107.t04474	stress responsive protein, putative, expressed	-	-	-	C3
LOC_Os08g03420|13108.t00244	kelch repeat protein, putative, expressed	GO:0005794//Golgi apparatus	-	-	C3
LOC_Os08g29669|13108.t02727	cytochrome b5-like Heme/Steroid binding domain containing protein, expressed	-	-	GO:0009607//response to biotic stimulus	C3
LOC_Os08g30210|13108.t02778	1-aminocyclopropane-1-carboxylate oxidase homolog 1, putative, expressed	-	GO:0003824//catalytic activity	-	C3
LOC_Os08g37580|13108.t03504	homeobox associated leucine zipper, putative, expressed	-	GO:0003677//DNA binding	-	C3
LOC_Os08g38270|13108.t03573	fasciclin domain containing protein, expressed	-	GO:0003674//molecular_function	-	C3
LOC_Os08g44750|13108.t04208	auxin-induced protein 5NG4, putative, expressed	GO:0016020//membrane	-	-	C3
LOC_Os09g15480|13109.t01344	Ser/Thr-rich protein T10 in DGCR region, putative, expressed	-	-	-	C3
LOC_Os09g31040|13109.t02749	EF hand family protein, putative, expressed	-	GO:0005488//binding	-	C3
LOC_Os09g31430|13109.t02786	Os9bglu30 - beta-glucosidase, similar to Os4bglu12 exoglucanase, expressed	GO:0005618//cell wall	-	-	C3
LOC_Os09g32640|13109.t02881	dehydrogenase, putative, expressed	-	GO:0005488//binding	-	C3
LOC_Os10g09930|13110.t00801	expressed protein	-	-	-	C3
LOC_Os10g13700|13110.t01094	phosphoenolpyruvate carboxykinase, putative, expressed	-	-	-	C3
LOC_Os10g26700|13110.t02073	YGL010w, putative, expressed	-	-	-	C3
LOC_Os10g29470|13110.t02287	dehydrogenase, putative, expressed	-	GO:0005488//binding	-	C3
LOC_Os10g32050|13110.t02521	ankyrin repeat domain containing protein, expressed	-	-	-	C3
LOC_Os10g38470|13110.t03090	glutathione S-transferase, putative, expressed	-	GO:0016740//transferase activity	-	C3
LOC_Os11g02080|13111.t00104	expressed protein	-	-	-	C3
LOC_Os11g02350|13111.t00131	LTPL25 - Protease inhibitor/seed storage/LTP family protein precursor, expressed	GO:0005886//plasma membrane	-	-	C3
LOC_Os11g02440|13111.t00139	chalcone--flavonone isomerase, putative, expressed	-	GO:0003824//catalytic activity	-	C3
LOC_Os11g25860|13111.t02196	protein Kinase, putative, expressed	-	GO:0000166//nucleotide binding	-	C3
LOC_Os12g02040|13112.t00102	hypoxia-responsive family protein, putative, expressed	-	-	-	C3
LOC_Os12g02370|13112.t00134	chalcone--flavonone isomerase, putative, expressed	-	GO:0003824//catalytic activity	-	C3
LOC_Os12g36210|13112.t03320	inhibitor I family protein, putative, expressed	-	-	-	C3
LOC_Os12g36220|13112.t03321	inhibitor I family protein, putative, expressed	-	-	-	C3
LOC_Os12g36240|13112.t03323	inhibitor I family protein, putative	-	-	-	C3
LOC_Os01g08600|13101.t00738	expressed protein	-	-	-	C4
LOC_Os01g11460|13101.t01009	zinc finger, C3HC4 type domain containing protein, expressed	-	GO:0003824//catalytic activity	-	C4
LOC_Os01g36950|13101.t03165	N-rich protein, putative, expressed	-	-	-	C4
LOC_Os01g49370|13101.t04298	expressed protein	-	-	-	C4
LOC_Os01g52110|13101.t04561	RING finger and CHY zinc finger domain-containing protein 1, putative, expressed	-	GO:0005488//binding	-	C4
LOC_Os01g53620|13101.t04702	expressed protein	-	-	-	C4
LOC_Os01g54550|13101.t04793	HSF-type DNA-binding domain containing protein, expressed	-	GO:0003677//DNA binding	-	C4
LOC_Os01g55430|13101.t04878	OsFBT2 - F-box and tubby domain containing protein, expressed	-	GO:0003700//sequence-specific DNA binding transcription factor activity	-	C4
LOC_Os02g01970|13102.t00101	expressed protein	-	-	-	C4
LOC_Os02g03220|13102.t00224	protein binding protein, putative, expressed	-	-	-	C4
LOC_Os02g05430|13102.t00447	expressed protein	-	-	-	C4
LOC_Os02g05680|13102.t00472	apoptosis-inducing factor 2, putative, expressed	-	GO:0003674//molecular_function	-	C4
LOC_Os02g06725|13102.t05533	expressed protein	-	-	-	C4
LOC_Os02g08440|13102.t00754	OsWRKY71 - Superfamily of TFs having WRKY and zinc finger domains, expressed	-	GO:0003700//sequence-specific DNA binding transcription factor activity	-	C4
LOC_Os02g36530|13102.t03307	hypothetical protein	-	-	-	C4
LOC_Os02g47670|13102.t04389	bg55, putative, expressed	-	-	-	C4
LOC_Os02g50990|13102.t04726	RING-H2 finger protein ATL1Q, putative, expressed	-	GO:0003824//catalytic activity	-	C4
LOC_Os02g54730|13102.t05097	transmembrane amino acid transporter protein, putative, expressed	-	GO:0005215//transporter activity	-	C4
LOC_Os03g05540|13103.t00434	tetratricopeptide repeat containing protein, putative, expressed	-	-	-	C4
LOC_Os03g15540|13103.t01359	HEAT repeat family protein, putative, expressed	-	GO:0005215//transporter activity	-	C4
LOC_Os03g15560|13103.t01361	wibg, putative, expressed	-	-	-	C4
LOC_Os03g15750|13103.t01380	ASC1, putative, expressed	-	-	-	C4
LOC_Os03g16480|13103.t01449	zinc finger family protein, putative, expressed	-	GO:0003824//catalytic activity	-	C4
LOC_Os03g17470|13103.t01542	IN2-1 protein, putative, expressed	-	-	-	C4
LOC_Os03g17900|13103.t01582	hydrolase, alpha/beta fold family protein, putative, expressed	-	GO:0003824//catalytic activity	-	C4
LOC_Os03g17940|13103.t01586	phosphatase, putative, expressed	-	-	-	C4
LOC_Os03g18264|13103.t01618	expressed protein	-	-	-	C4
LOC_Os03g20460|13103.t01830	guanylate kinase, putative, expressed	-	GO:0016301//kinase activity	-	C4
LOC_Os03g42464|13103.t03656	expressed protein	-	-	-	C4
LOC_Os03g43720|13103.t03767	transporter family protein, putative, expressed	-	GO:0005215//transporter activity	-	C4
LOC_Os03g55430|13103.t04812	expressed protein	-	-	-	C4
LOC_Os03g61240|13103.t05367	expressed protein	-	-	-	C4
LOC_Os03g62650|13103.t05505	ion channel DMI1-like, chloroplast precursor, putative, expressed	-	-	-	C4
LOC_Os04g01230|13104.t00024	phosphoglycerate mutase, putative, expressed	-	GO:0003824//catalytic activity	-	C4
LOC_Os04g02670|13104.t00158	hypothetical protein	-	-	-	C4
LOC_Os04g13260|13104.t01135	expressed protein	-	-	-	C4
LOC_Os04g16830|13104.t01425	DNA-directed RNA polymerase subunit beta, putative	-	-	-	C4
LOC_Os04g21110|13104.t01827	phosphoribulokinase/Uridine kinase family protein, expressed	-	GO:0000166//nucleotide binding	-	C4
LOC_Os04g45370|13104.t04059	OsSAUR19 - Auxin-responsive SAUR gene family member, expressed	-	-	-	C4
LOC_Os04g49520|13104.t04459	pentatricopeptide repeat protein PPR868-14, putative, expressed	GO:0005739//mitochondrion	-	-	C4
LOC_Os04g56590|13104.t05135	ATP/GTP binding protein, putative, expressed	-	-	-	C4
LOC_Os04g56610|13104.t05137	expressed protein	-	-	-	C4
LOC_Os05g05480|13105.t00442	OsDegp6 - Putative Deg protease homologue, expressed	-	-	GO:0009987//cellular process	C4
LOC_Os05g11090|13105.t00955	thioredoxin, putative, expressed	-	-	-	C4
LOC_Os05g29050|13105.t02579	phospholipase D p1, putative, expressed	GO:0005886//plasma membrane	-	-	C4
LOC_Os05g34270|13105.t03049	inactive receptor kinase At1g27190 precursor, putative, expressed	-	GO:0000166//nucleotide binding	-	C4
LOC_Os05g35980|13105.t03218	expressed protein	-	-	-	C4
LOC_Os05g41780|13105.t03750	AP2 domain containing protein, expressed	-	GO:0003677//DNA binding	-	C4
LOC_Os05g50710|13105.t04553	late embryogenesis abundant protein, putative, expressed	-	-	GO:0000003//reproduction	C4
LOC_Os05g50910|13105.t04574	extra-large G-protein-related, putative, expressed	-	-	-	C4
LOC_Os06g03670|13106.t00256	dehydration-responsive element-binding protein, putative, expressed	-	GO:0003677//DNA binding	-	C4
LOC_Os06g14406|13106.t01314	SYD, putative, expressed	-	-	-	C4
LOC_Os06g21400|13106.t01956	hypothetical protein	-	-	-	C4
LOC_Os06g23800|13106.t02188	flavin-containing monooxygenase family protein, putative, expressed	-	GO:0003824//catalytic activity	-	C4
LOC_Os06g25500|13106.t02349	hypothetical protein	-	-	-	C4
LOC_Os06g36490|13106.t03324	ethylene-responsive element-binding protein, putative, expressed	-	-	-	C4
LOC_Os06g49880|13106.t04657	B-box zinc finger family protein, putative, expressed	-	GO:0003700//sequence-specific DNA binding transcription factor activity	-	C4
LOC_Os07g04450|13107.t00339	expressed protein	-	-	-	C4
LOC_Os07g07530|13107.t00637	expressed protein	-	-	-	C4
LOC_Os07g14310|13107.t01298	expressed protein	-	-	-	C4
LOC_Os07g20420|13107.t01850	tetratricopeptide-like helical, putative, expressed	-	GO:0003674//molecular_function	-	C4
LOC_Os07g25002|13107.t04585	chloroplast 30S ribosomal protein S7, putative, expressed	-	-	-	C4
LOC_Os07g25810|13107.t02269	retrotransposon protein, putative, unclassified, expressed	-	-	-	C4
LOC_Os07g37570|13107.t03409	expressed protein	-	-	-	C4
LOC_Os07g45300|13107.t04158	tim44-like domain containing protein	-	-	-	C4
LOC_Os08g14580|13108.t01342	haloacid dehalogenase-like hydrolase domain-containing protein 1A, putative, expressed	GO:0005739//mitochondrion	-	-	C4
LOC_Os08g15296|13108.t04310	photosystem II reaction center protein H, putative, expressed	-	-	-	C4
LOC_Os08g19140|13108.t01740	adenylate kinase family protein, putative, expressed	GO:0005634//nucleus	-	-	C4
LOC_Os08g19210|13108.t01747	expressed protein	-	-	-	C4
LOC_Os08g30020|13108.t02760	membrane protein, putative, expressed	-	-	-	C4
LOC_Os08g37700|13108.t03517	RNA recognition motif containing protein, putative, expressed	-	GO:0003676//nucleic acid binding	-	C4
LOC_Os08g38460|13108.t03591	zinc finger, C3HC4 type domain containing protein, expressed	-	GO:0003824//catalytic activity	-	C4
LOC_Os08g39050|13108.t03648	pentatricopeptide, putative, expressed	-	GO:0003674//molecular_function	-	C4
LOC_Os09g19952|13109.t01734	ribosomal protein L22, putative	-	-	-	C4
LOC_Os09g19954|13109.t01735	ribosomal protein, putative	-	GO:0005198//structural molecule activity	-	C4
LOC_Os09g23740|13109.t02065	1-phosphatidylinositol-4-phosphate 5-kinase/ zinc ion binding protein, putative, expressed	-	GO:0005488//binding	-	C4
LOC_Os09g25380|13109.t02225	kinesin motor protein-related, putative, expressed	-	GO:0003774//motor activity	-	C4
LOC_Os09g26700|13109.t02355	choline/ethanolamine kinase, putative, expressed	-	GO:0016301//kinase activity	-	C4
LOC_Os09g27140|13109.t02400	expressed protein	-	-	-	C4
LOC_Os09g30070|13109.t02685	expressed protein	-	-	-	C4
LOC_Os09g37920|13109.t03280	helicase, putative, expressed	GO:0005739//mitochondrion	-	-	C4
LOC_Os09g38330|13109.t03315	MORN repeat domain containing protein, expressed	-	GO:0016301//kinase activity	-	C4
LOC_Os10g02770|13110.t00167	glycosyl hydrolases family 16, putative, expressed	GO:0005618//cell wall	-	-	C4
LOC_Os10g21418|13110.t03614	NADPH-dependent oxidoreductase, putative	-	-	-	C4
LOC_Os10g33990|13110.t02695	DUF584 domain containing protein, putative, expressed	-	-	-	C4
LOC_Os10g40550|13110.t03291	CPuORF23 - conserved peptide uORF-containing transcript, expressed	-	-	GO:0005975//carbohydrate metabolic process	C4
LOC_Os10g42410|13110.t03462	zinc-binding protein, putative, expressed	-	GO:0005488//binding	-	C4
LOC_Os11g31880|13111.t02780	phosphoglycerate mutase, putative, expressed	-	GO:0003824//catalytic activity	-	C4
LOC_Os11g33100|13111.t02902	SNARE associated Golgi protein, putative, expressed	-	-	-	C4
LOC_Os11g35400|13111.t03086	AMP-binding enzyme, putative, expressed	-	GO:0000166//nucleotide binding	-	C4
LOC_Os12g04260|13112.t00317	astaxanthin synthase KC28, putative	-	-	-	C4
LOC_Os12g32580|13112.t02960	expressed protein	-	-	-	C4
LOC_Os12g34018|13112.t04154	ATP synthase protein YMF19, putative, expressed	-	-	-	C4
LOC_Os01g59200|13101.t05236	DUF617 domain containing protein, expressed	-	-	-	C4
